1 Single cell transcriptomic analysis of bloodstream form *Trypanosoma brucei*  
2 reconstructs cell cycle progression and differentiation via quorum sensing

3  
4 Emma M. Briggs<sup>1,2\*</sup>, Richard McCulloch<sup>2</sup>, Keith R. Matthews<sup>1</sup>, Thomas D. Otto<sup>2</sup>

5  
6 **Author information**

7 These authors contributed equally: Keith R. Matthews and Thomas D. Otto

8  
9 Corresponding author

10 \*Correspondence to Emma M. Briggs ([emma.briggs@ed.ac.uk](mailto:emma.briggs@ed.ac.uk))

11  
12 **Affiliations:**

13 1. Institute for Immunology and Infection Research, School of Biological Sciences, University  
14 of Edinburgh, Edinburgh, UK

15 2. Wellcome Centre for Integrative Parasitology, Institute of Infection, Immunity and  
16 Inflammation, University of Glasgow, Glasgow, UK

17  
18 **Abstract**

19  
20 The life cycles of African trypanosomes are dependent on several differentiation steps,  
21 where parasites transition between replicative and non-replicative forms specialised for  
22 infectivity and survival in mammal and tsetse fly hosts. Here, we use single cell  
23 transcriptomics (scRNA-seq) to dissect the asynchronous differentiation of replicative  
24 slender to transmissible stumpy bloodstream form *Trypanosoma brucei*. Using oligopeptide-  
25 induced differentiation, we accurately modelled stumpy development *in vitro* and captured  
26 the transcriptomes of 9,344 slender and stumpy stage parasites, as well as parasites  
27 transitioning between these extremes. Using this framework, we detail the relative order of  
28 biological events during development, profile dynamic gene expression patterns and  
29 identify putative novel regulators. Using marker genes to deduce the cell cycle phase of  
30 each parasite, we additionally map the cell cycle of proliferating parasites and position  
31 stumpy cell cycle exit at early G1, with subsequent progression to a distinct G0 state. We  
32 also explored the role of one gene, ZC3H20, with transient elevated expression at the key  
33 slender to stumpy transition point. By scRNA-seq analysis of ZC3H20 null parasites exposed  
34 to oligopeptides and mapping the resulting transcriptome to our atlas of differentiation, we  
35 identified the point of action for this key regulator. Using a developmental transition  
36 relevant for both virulence in the mammalian host and disease transmission, our data  
37 provide a paradigm for the temporal mapping of differentiation events and regulators in the  
38 trypanosome life cycle.

39  
40 **Introduction**

41  
42 African trypanosome parasites cause both human<sup>1</sup> and animal<sup>2</sup> trypanosomiases and are  
43 transmitted between hosts across sub-Saharan Africa by tsetse flies. During its life cycle  
44 *Trypanosoma brucei* undergoes several developmental transitions, comprising changes in  
45 nutrient-specific metabolism, morphology, organelle organisation and structure, and stage-  
46 specific surface protein expression<sup>3</sup>, facilitating parasite survival and transmission. In the  
47 mammalian host, long slender bloodstream forms replicate extracellularly, increasing in

48 numbers to trigger differentiation into short stumpy bloodstream form parasites via a  
49 quorum sensing (QS) process<sup>4,5</sup>, with ill-defined intermediate forms between these  
50 morphological extremes<sup>6,7</sup>. Stumpy forms remain arrested in the cell cycle<sup>8</sup> until ingested by  
51 a feeding tsetse fly, where they are pre-adapted to survive in the midgut<sup>9,10</sup>. Here, stumpy  
52 forms undergo a further differentiation event and re-enter the cell cycle as tsetse-midgut  
53 procyclic forms<sup>9,11</sup>.

54  
55 Slender and stumpy forms differ at both the transcript<sup>12-17</sup> and protein level<sup>18,19</sup>, as do  
56 stumpy and procyclic parasites<sup>15-17,19</sup>. Reflecting their metabolism, slender forms show high  
57 levels of transcripts encoding glycosomal components (specialist organelles housing  
58 glycolytic enzymes)<sup>9</sup>, whereas stumpy parasites upregulate transcripts related to a maturing  
59 mitochondrion as they prepare for the tsetse midgut. This allows for metabolism of  
60 pyruvate, as well as proline and threonine, to generate ATP in low glucose conditions<sup>9,13-  
61 15,20</sup>. Consistent with exit from the cell cycle, stumpy parasites down-regulate histone, DNA  
62 replication/repair, translation and cytoskeleton-related transcripts<sup>15</sup>. Additionally, PAD  
63 (Proteins Associated with Differentiation) transcripts are upregulated in stumpy forms and  
64 are required for further development into procyclics<sup>21</sup>. Transcripts encoding EP and GPEET  
65 repeat procyclin surface proteins expressed in tsetse midgut forms are also elevated in  
66 stumpy forms, whereas variant surface glycoprotein (VSGs) transcripts, required for immune  
67 evasion by the parasite in the mammal, are reduced. Transcript analysis of *T. brucei*  
68 parasites isolated during parasitaemia *in vivo* suggested some of these changes occur in  
69 early differentiating parasites, before morphologically detectable stumpy forms dominate at  
70 the peak of parasitemia<sup>22</sup>.

71  
72 QS based development between slender and stumpy forms has been recently characterised,  
73 identifying several factors involved in detecting the differentiation stimulus<sup>23</sup>, signal  
74 propagation<sup>24,25</sup> and implementation of cellular changes<sup>24,26-28</sup>. Yet, understanding the  
75 detailed developmental progression toward stumpy cells has been hampered by the  
76 asynchrony of this differentiation step, as has the relationship of differentiation regulatory  
77 genes to the various biological events involved. However, single-cell RNA sequencing  
78 (scRNA-seq) offers the opportunity to study individual cells in a heterogenous population, to  
79 identify rare cell types and decipher complex and transient developmental processes<sup>29-31</sup>.  
80 Recently, scRNA-seq has been used to study antigenic variation in *T. brucei*<sup>32</sup>, as well as to  
81 describe the diversity of parasites in the tsetse fly salivary gland<sup>33</sup>. The latter study revealed  
82 early and late stages of metacyclic development, previously indistinguishable by population-  
83 based RNA-seq<sup>34</sup>, highlighting the differing expression of surface proteins within the  
84 developing population<sup>33</sup>.

85  
86 Here, we applied scRNA-seq to analyse 9,344 differentiating parasites progressing from  
87 bloodstream slender, through intermediate, to stumpy parasites *in vitro* using oligopeptide-  
88 rich bovine brain heart infusion (BHI) broth<sup>23</sup>, deriving a temporal map of this transition at  
89 the transcript level based on individual cells. Detailed analysis of the associated expression  
90 patterns revealed the absence of a discrete “intermediate” transcriptome, mapped the  
91 relative timing of biological events during differentiation, including exit from the cell cycle  
92 specifically prior to late G1, and identified novel genes regulated during the transition.  
93 Moreover, scRNA-seq analysis of a null mutant for one important regulator elevated at the  
94 slender to stumpy transition, ZC3H20<sup>26,27</sup>, precisely mapped where development fails in its

95 absence in molecular terms. In combination, this provides a paradigm for the temporal  
96 mapping of developmental events and regulators during the parasite's dynamic  
97 differentiation programme in its mammalian host.

98

## 99 Results

100

### 101 **scRNA-seq identifies transcriptionally distinct long slender and short stumpy form *T.*** 102 ***brucei***

103

104 To model stumpy development *in vitro*, pleomorphic *T. brucei* EATRO 1125 AnTa1.1 90:13  
105 slender parasites were treated with oligopeptide-rich BHI broth, able to induce *T. brucei*  
106 bloodstream form differentiation in a titratable manner<sup>23</sup>. In the presence of 10% BHI,  
107 parasites underwent growth arrest (Fig. S1a), increased expression of the stumpy marker  
108 protein PAD1<sup>35</sup> (Fig. S1b), and increased the percentage of parasites containing one copy of  
109 the nucleus and one copy of the kinetoplast network (1N1K), indicating cell cycle  
110 accumulation in G1/G0 and differentiation into stumpy forms<sup>8</sup> (Fig. S1c). After 72 hr, 72.5%  
111 of cells expressed PAD1 (Fig. S1b) and 89.3% were in the 1N1K cell cycle configuration (Fig  
112 S1c). To capture the transcriptomes of slender, intermediate and stumpy *T. brucei*, we  
113 combined parasites after 0, 24, 48 or 72 hr of 10% BHI treatment in equal numbers. 15,000  
114 cells of this heterogenous pool were then subjected to scRNA-seq using the Chromium  
115 Single Cell 3' workflow (10X Genomics) and Illumina sequencing<sup>36</sup>. Two independent  
116 biological replicates (WT 1 and WT 2) were generated and, after filtering to remove  
117 transcriptomes of poor quality or likely doublets, 9,344 cells remained (5,793 and 3,551,  
118 respectively; Fig. S2 and Supplementary data 1). The transcripts of 8,757 genes were  
119 captured in at least 5 cells in both replicate experiments (10 cells total), with medians of  
120 1,051 and 1,439 genes detected per cell, respectively. Cells from the two replicate  
121 experiments were integrated and UMAP (Uniform Manifold Approximation and  
122 Projection<sup>37</sup>) was used to visualise the relationship between individual *T. brucei*  
123 transcriptomes in low dimensional space, where variation between transcriptomes dictates  
124 the space between cells (Fig. 1a, b, d). Cells from WT 1 and WT 2 experiments overlapped  
125 (Fig. 1a), indicating the capture of reproducible cell types in each replicate. Clustering  
126 analysis identified four distinct groups containing transcriptionally similar cells (Fig. 1b;  
127 Supplementary data 2), each appearing in comparable proportions per replicate (Fig. 1c).

128

129 Slender- and stumpy-like cells were clearly identifiable by the expression of marker genes:  
130 slender-associated glycolytic genes GAPDH and PYK1<sup>38</sup>; and the stumpy markers, PAD2<sup>21</sup>  
131 and EP1 procyclin<sup>13</sup> (Fig. 1d). Differential expression analysis of transcripts between the  
132 slender A, slender B, stumpy A and stumpy B clusters identified 519 marker genes (adjusted  
133 p-value < 0.05, logFC > 0.25); relative expression of the top unique markers is plotted in Fig.  
134 1e. Markers of slender A and slender B overlapped extensively (Supplementary data 2); 178  
135 slender marker genes were upregulated in both slender A and slender B relative to stumpy  
136 clusters, including glycolytic genes (for example, hexokinase, phosphoglycerate kinase,  
137 glucose-6-phosphate isomerase), genes involved in cytoskeleton organisation (e.g. beta  
138 tubulin, cytoplasmic dynein 2 heavy chains 1 and 2), cell cycle regulating genes (e.g. cyclin  
139 10, cyclin-like F-box protein 2 and T-complex protein 1 subunits gamma and delta) and RNA-  
140 binding protein 10 (RBP10), which is a positive regulator of bloodstream form  
141 transcripts<sup>39,40</sup>. Markers unique to slender A or slender B (183 and 95, respectively) were

142 generally related to the cell cycle phase of these cells and are discussed in detail below. The  
143 top differentially expressed markers of slender A were FAZZ (flagellum attachment zone  
144 protein 2), CPC2 (chromosomal passenger complex 2) and histone H2B (Fig. 1e and f).  
145 Glycosomal membrane protein gim5B, a putative S-adenosylhomocysteine hydrolase  
146 (AdoHcyase) and uridine phosphorylase (UPP) were the top markers of slender B (Fig. 1e  
147 and f). 55 genes were upregulated in stumpy A cells relative to the other clusters, including  
148 purine nucleoside transporter NT10 (known to be associated with stumpy forms<sup>41,42</sup>),  
149 succinyl-CoA synthetase alpha subunit (SCS-alpha), and succinyl-CoA ligase [GDP-forming]  
150 beta-chain (SUCLG2) (Fig. 1e and f). Just 9 genes significantly distinguished stumpy B cells,  
151 including four encoded by the mitochondrial genome: cytochrome oxidase subunits I-III  
152 (COI, COII, COIII) and NADH dehydrogenase subunit 1 (ND1) (Fig. 1e,f).

153  
154 Gene ontology (GO) term enrichment analysis revealed the association of each cluster's  
155 marker genes with distinct biological processes (Fig. 1g). Several terms relating to cell cycle  
156 processes were enriched in slender A marker genes: organelle and cilium organisation,  
157 chromosome segregation, and cell division. Cell cycle regulation genes, including Cytokinesis  
158 Initiation factor 1 (CIF1)<sup>43</sup> and 14-3-3 protein 1 (14-3-3-I)<sup>44</sup>, glycosylphosphatidylinositol-  
159 specific phospholipase C (GPI-PLC), involved with GPI anchor release<sup>45</sup>, and a positive  
160 regulator of differentiation, ZC3H20<sup>26,27,46</sup>, were all upregulated in slender A and slender B  
161 cells compared to stumpy cells. Slender B was also associated with the genes implicated in  
162 quorum sensing, including protein phosphatase 2C (PP2C) and Trichoalylin<sup>24</sup>, as well as  
163 genes putatively involved in cell communication (Ras-related protein Rab5A<sup>47</sup> and thimet  
164 oligopeptidase). Stumpy A marker genes were associated with the TCA cycle (mitochondrial  
165 malate dehydrogenase, two 2-oxoglutarate dehydrogenase E1 component encoding genes,  
166 and succinyl-CoA ligase [GDP-forming] beta-chain<sup>48</sup>), oxidation-reduction process  
167 (dihydrolipoyl dehydrogenase<sup>4,49-51</sup> and glutamate dehydrogenase<sup>52</sup>), rRNA metabolism  
168 (splicing factor TSR1<sup>53</sup>, nucleolar RNA-binding protein NOPP44/46-1<sup>54-56</sup> and Lupus LA  
169 protein homolog<sup>57</sup>), and cell differentiation (zinc finger protein 2; ZFP2<sup>58</sup>). GO term analysis  
170 of stumpy B marker genes was limited due to their small number but included post-  
171 transcriptional regulators of gene expression, due to the presence of ZC3H11, which is also  
172 involved in heat shock response<sup>59</sup>, and PAD2, which is involved in detecting the  
173 differentiation to procyclic forms stimulus via citrate transport<sup>21</sup>.

174  
175 Taken together, the above clustering analysis revealed distinct slender and stumpy clusters,  
176 with significant variation within each population. Interestingly, a distinct cluster  
177 representative of a discrete "intermediate" stage transcriptome between slender and  
178 stumpy forms was not evident.

## 179 180 **Trajectory analysis of long slender to short stumpy differentiation**

181  
182 As clustering analysis highlighted the transition from slender and stumpy cells involved  
183 overlapping gene expression and GO term association, we conducted trajectory inference  
184 and pseudotime analysis to study gene expression changes during stumpy development in  
185 detail. Individual cells were replotted as a PHATE (Potential of Heat-diffusion for Affinity-  
186 based Transition Embedding) map (Fig. 2a-c), which captures the local and global structure  
187 of high-dimensional data to preserve the continual progression of developmental  
188 processes<sup>60</sup>. Here, slender A and slender B clusters remained clearly separate, whereas

189 stumpy A and stumpy B showed more extensive overlap (Fig. 2a). A linear trajectory starting  
190 from slender A cells was identified (Fig. 2b). Slender and stumpy marker gene (GAPDH,  
191 PYK1, PAD2 and EP1) expression across the trajectory confirmed capture of the transition  
192 from slender to stumpy forms (Fig. 2c). 2001 genes were identified as differentially  
193 expressed as a function of pseudotime (p value < 0.05, fold change > 2) and were grouped  
194 into 9 modules (A-I) of co-expressed genes that showed similar patterns of expression  
195 across differentiation (Fig. 2d; Supplementary data 2). Of these, 1,335 genes were  
196 previously found to be significantly (adjusted p-value < 0.05) differentially expressed  
197 between slender and stumpy enriched populations of *T. brucei* isolated from low and peak  
198 parasitaemia *in vivo*, respectively<sup>12</sup>, confirming the physiological relevance of *in vitro*,  
199 oligopeptide induced, differentiation (Fig. 2e). Proportionally fewer genes in modules A  
200 (transiently down regulated) and F (transiently upregulated) had been identified in bulk  
201 RNA-seq data as differentially expressed (33.3% and 49%, respectively) compared to the  
202 remaining modules (59.1 - 78.9%), highlighting the ability of single cell analyses to reveal  
203 transient events in an asynchronous developmental trajectory.

204

205 GO term enrichment for biological processes associated with each gene module revealed  
206 the relative order of biological events during slender to stumpy development (Fig. 2f).  
207 Processes upregulated at the start of the trajectory included chromosome segregation and  
208 regulation of cytokinesis (module B), and these were then followed by cell division (modules  
209 C and D), indicating the progression of the later stages of the cell cycle. Module D also  
210 included genes linked to stimulus response, including PKA-R (previously identified as a  
211 potential signal transducer during stumpy development in response to hydrolysable-  
212 cAMP<sup>24</sup>), cAMP-specific phosphodiesterases 1 and 2 (PDEB1 and PDEB2), the known  
213 differentiation regulator RBP7B<sup>24,25</sup>, DHFR-TS, an enzyme required for thymine synthesis<sup>61</sup>,  
214 and mitotic cyclin CYC8<sup>62</sup>. Module E genes, which are broadly expressed across the slender  
215 parasites and peaked in expression slightly later in pseudotime, include GPI-PLC, which  
216 releases the VSG coat via hydrolysis of the GPI-anchor<sup>45</sup>, and genes associated with  
217 cytoskeleton organisation (beta tubulin, actin A, cytoskeleton associated proteins CAP51V  
218 and CAP5.5V<sup>63,64</sup>). Module F consisted of transiently upregulated genes, including the  
219 known stumpy and procyclic developmental regulator ZC3H20<sup>26,27,46</sup>, and MCP1, a pyruvate  
220 transporter present in the mitochondrial membrane<sup>65</sup>. Module G-I genes peaked in the later  
221 stages of development and include further genes identified in a reverse-genetic screen for  
222 stumpy development factors: the chromatin regulator ISWI, a phosphoglycerate mutase  
223 protein, KRIPP14, APPBP1, and hypothetical proteins Tb927.11.300 and Tb927.11.1640<sup>24</sup>.  
224 Module G included genes encoding components of the TCA cycle: mitochondrial chaperone  
225 BCS1, and four ATP synthase genes (ATPF1A, ATPB and mitochondrial ATP synthase delta  
226 chain<sup>48</sup>). Protein coding genes associated with rRNA metabolism (n = 31) and ribosome  
227 biogenesis (n = 44) were also upregulated in the later stages of development, including 20  
228 large ribosomal subunit components and 2 rRNA methyltransferases. These might be  
229 related to the translational preparedness exhibited by quiescent stumpy forms for  
230 development to procyclic forms and the resumption of translation<sup>22</sup>. Six genes linked to cell  
231 cycle arrest were identified in module H, all encoding copies of retrotransposon hotspot  
232 protein RHS4<sup>66</sup>. kDNA-encoded genes RPS12, ND1, COI-III, and NDH4<sup>67</sup>, were all increased in  
233 the later stages of development (modules G-I). Cytochrome B (Cyb), which was not sorted  
234 into a gene module, peaked at the very end of development (Fig. 2g). Beyond these  
235 annotated genes, 635 hypothetical genes were identified as differentially expressed during

236 slender to stumpy differentiation, including predicted gene regulators<sup>68</sup> Tb927.8.7820  
237 (transiently upregulated), Tb927.8.4190 (transiently down regulated), and Tb927.11.11680,  
238 which peaks in stumpy cells (Fig. 2g).

239

240 Pseudotime analysis was able to identify novel genes differentially expressed during  
241 bloodstream form differentiation, as well as each gene's detailed expression pattern. The  
242 relative timing of events, from proliferation (chromosome segregation, cytokinesis), cell  
243 cycle exit, cell remodelling, through to a maturing mitochondrion and expression of  
244 procyclin surface protein transcripts, can be inferred from these expression patterns.  
245 Additionally, the expression peaks of known and putative developmental regulators were  
246 identified relative to this progression.

247

### 248 **Transcript abundance during the bloodstream slender cell cycle**

249

250 As replicating slender bloodstream form cells were captured in these experiments, we next  
251 asked if the scRNA-seq data could reveal greater detail than currently available on gene  
252 expression changes during the cell cycle. We first assigned each cell to a cell cycle phase  
253 using marker genes previously identified by bulk RNA-seq analysis<sup>69</sup>, (Fig. 3a, S3). Slender A  
254 and slender B cells were clearly grouped closer to cells of the same phase, with the parasites  
255 most distal to the stumpy A and stumpy B cells labelled as late G1, followed by S and G2/M  
256 phase cells. Slender B cells most proximal to stumpy A contained all four cell cycle phases,  
257 although early G1 cells were enriched here. Stumpy A and stumpy B cells were marked as a  
258 variety of all the cell cycle phases, indicating the phase of stumpy parasites cannot be clearly  
259 identified with these markers and stumpy parasites do not clearly reside with the G1 phase  
260 of actively replicating parasites.

261

262 Slender A and slender B clusters were next isolated and low dimensional projection of the  
263 data was repeated, resulting in these cells organising into a circular profile (Fig. 3b). Cells  
264 were clearly arranged by their cell cycle status within this ring, with late G1, S and G2/M  
265 phase cells distinguishable. Although early G1 cells were enriched between G2/M and late  
266 G1 cells, as expected, they overlapped with both neighbouring phases, indicating this stage  
267 was less well defined by the scoring. To assess gene expression changes during the cell  
268 cycle, we fitted a cyclical trajectory to this plot and assigned pseudotime values (Fig. 3c).  
269 Testing each gene for expression patterns associated with pseudotime identified 1,897 that  
270 were significantly (adj. p-value < 0.05) differentially expressed (Supplementary data 3). 854  
271 of these changed in abundance by more than 2-fold (Fig. 3d). GO term enrichment revealed  
272 expected GO terms associated with the cell cycle; 33 genes associated with the term "cell  
273 cycle process" are highlighted in Fig. 3d. Amongst these 33 genes were several where  
274 protein levels or distribution have been shown to match the scRNA-seq predicted cell cycle  
275 timing of expression, including ORC1B<sup>70</sup>, AUK1<sup>71</sup>, PCNA<sup>72</sup> and KKIP5<sup>73</sup>. Many further genes  
276 displayed cell cycle regulated expression that has not yet been explored (Supplementary  
277 data 3). For instance, two cyclin genes were identified, each with a distinct expression  
278 profile; CYC4 transcripts were more abundant before the appearance of late G1 and S phase  
279 cells and CYC6 peaked post-late G1. CYC8 peaked specifically during late G1, as previously  
280 documented by bulk RNA-seq analysis of cell cycle sorted populations<sup>69</sup> (Fig. 3e).

281

282 In addition to genes driving the cell cycle, we identified three genes previously shown to be  
283 involved in stumpy development with differential expression patterns in slender cells (Fig.  
284 3f). RBP7B<sup>24</sup> expression increased in late G1 cells and persisted through to G2/M. PPC2, in  
285 contrast, showed the opposite pattern of expression, decreasing in late G1/S phase  
286 parasites. ZC3H20<sup>26,27,46</sup> is highly abundant at the transcript level, yet dropped in expression  
287 in late G1/S phase *T. brucei*.

288

### 289 **ZC3H20 null parasites fail to differentiate in response to BHI**

290

291 The above analysis highlighted differential expression patterns of several stumpy  
292 development regulators, including ZC3H20, which peaks in expression at the slender B to  
293 stumpy transition in pseudotime (Fig. 2g). As ZC3H20 has been previously shown to be  
294 required for differentiation *in vivo* and *in vitro* at high density<sup>26,27</sup>, we repeated scRNA-seq  
295 analysis with a ZC3H20 null *T. brucei* line<sup>27</sup> to investigate where parasites fail in their  
296 development to stumpy forms with respect to transcriptome changes and, potentially, to  
297 identify direct or indirect mRNA targets of ZC3H20 itself. We first tested the effect of 10%  
298 BHI broth on ZC3H20 null *T. brucei* parasites (ZC3H20 KO)<sup>27</sup> (Fig. 4a-c). Although the growth  
299 rate was reduced in the presence of 10% BHI broth, ZC3H20 KO parasites continued to  
300 replicate after WT cells arrested (Fig 4a) and, after 72 hr of culture with 10% BHI, ZC3H20 KO  
301 parasites failed to express the PAD1 protein (Fig. 4b). Additionally, we tested the ability of  
302 WT and ZC3H20 KO parasites exposed to BHI for 72 hr to differentiate into procyclic cells.  
303 Consistent with their inability to generate stumpy forms, after 3 hr of cis-aconitate  
304 treatment and incubation at 27 °C, none of ZC3H20 KO parasites expressed EP1 procyclin, in  
305 contrast with 84.34% of WT parasites, confirming ZC3H20 KO *T. brucei* fail to differentiate  
306 into functional stumpy cells when exposed to BHI broth (Fig. 4c).

307

308 ZC3H20 KO parasites were next cultured in 10% BHI for 0, 24, 48 or 72 hr and subjected to  
309 scRNA-seq, as described for WT samples. After quality control filtering, 2,294 cells (median  
310 1,051 genes per cell) remained and were integrated with the WT cells before dimensional  
311 reduction was performed and results were plotted as UMAPs (Fig. 4d, g, h). Clustering the  
312 ZC3H20 KO and WT integrated cells resulted in six distinct clusters: stumpy A and stumpy B,  
313 and four slender clusters, slender A.1, slender A.2, slender B.1, slender B.2 (Fig. 4d, e). These  
314 were identified as slender- and stumpy-like cells by the localised expression of marker genes  
315 GAPDH, PYK1, PAD2 and EP1 (Fig. 4g). Whereas 77.3% of WT cells were found in clusters  
316 stumpy A or stumpy B, only 0.3% of ZC3H20 KO cells were in either, consistent with near  
317 complete ablation of stumpy formation in the mutant parasites (Fig. 4f). The majority of WT  
318 slender parasites grouped as members of the slender A.2 and slender B.1 clusters (9.1% and  
319 11.2% of all parasites, respectively), whereas ZC3H20 KO cells were divided between the  
320 four slender clusters. Notably, the slender B.2 cohort was comprised almost entirely of  
321 ZC3H20 KO parasites (comprising 40.1% of total ZC3H20 KO vs 0.4% of total WT cells).  
322 Marker gene analysis between clusters (Fig. S3, Supplementary data 4), identified 94 marker  
323 genes upregulated in slender B.2 cells. Of these just 18 genes were uniquely significantly  
324 upregulated in cluster slender B.2, the top 5 genes being expression site-associated genes 2  
325 and 5 (ESAG2 and ESAG5), one non-coding RNA gene (Tb2.NT.8), a serine peptidase (Clan  
326 SC), Family S10 protein CBP1, and DNA topoisomerase II beta (TOP2B) (fig. 4h). Cell cycle  
327 status contributed considerably to clustering analysis of WT and ZC3H20 KO integrated cells,  
328 as slender cells clearly group by cell cycle phase (Fig. 4i).

329

### 330 **Trajectory comparison between WT and ZC3H20 KO cells reveals functional separation of** 331 **downregulation and upregulation of transcripts during differentiation**

332

333 To compare the transcriptomic changes in ZC3H20 KO and WT *T. brucei* after BHI treatment  
334 in detail, we inferred a trajectory from the WT and ZC3H20 KO integrated parasites (Fig. 5a).  
335 Doing so identified a branched trajectory: early in pseudotime, WT and ZC3H20 KO parasites  
336 were transcriptionally similar and arranged on the same lineage; later, there was a clear  
337 branch in their comparative development, ending for WT in stumpy cells and in slender B.2  
338 for ZC3H20 KO cells (Fig. 5a). To understand this change, we first assessed the expression of  
339 differentiation-associated genes identified previously in WT parasites (Fig 2d), mapping  
340 them across the truncated trajectory branch of the ZC3H20 KO cells (Fig 5b, c). 587 genes of  
341 the 2001 identified as differentially expressed during stumpy development in WT cells,  
342 significantly changed in expression in ZC3H20 KO parasites across the truncated trajectory  
343 (Fig. 5c), although the majority (94.2%) were less highly associated with the ZC3H20 KO  
344 trajectory relative to WT (Fig 5d; Supplementary data 4). 75.8% of these genes were part of  
345 co-expression modules B-E, which decreased in expression during stumpy development in  
346 WT parasites (Fig. 5c). These included genes involved with glycolysis, such as ATP-  
347 dependent 6-phosphofructokinase (PFK) and hexokinase 1 (HK1), and the mitotic cell cycle,  
348 including cdc2-related kinase 3 (CRK3) and aurora B kinase (AUK1) (fig. 5e). Genes  
349 differentially expressed in the ZC3H20 KO trajectory and belonging to expression modules  
350 F-H included heat shock 70 kDa protein mitochondrial precursor subunits B and C, and  
351 three components of the TCA cycle (succinyl-CoA ligase, mitochondrial malate  
352 dehydrogenase and 2-oxoglutarate dehydrogenase E1 component; 2-OGDH E1), but only 2-  
353 OGDH E1 increased to a similar level as seen in WT cells (Fig 5e). Hence, ZC3H20 KO cells  
354 down regulated transcripts associated with slender cells when exposed to the BHI  
355 differentiation stimulus, matching the response of WT cells. However, ZC3H20 KO parasites  
356 failed to upregulate transcripts later in development that are required for stumpy  
357 formation, and this point of dysregulation coincided with the peak of ZC3H20 expression  
358 during normal WT differentiation (Fig. 2g).

359

360 To identify regulators of early stumpy development, we looked for genes which changed  
361 significantly in abundance from the start of the trajectory to a point just downstream of the  
362 ZC3H20 branch (yellow dots, Fig. 5a). 234 genes changed in transcript abundance between  
363 these points and were associated with trajectory progression (Fig. 5f, Supplementary data  
364 4). 117 of these genes were associated with both WT and ZC3H20 KO trajectories (p-value  
365 <0.05) and include cell cycle associated genes (for example CPC2, Kinetoplastid-specific  
366 Protein Phosphatase 1, and structural maintenance of chromosome 4), as expected.  
367 Additionally, differentiation associated genes RDK2<sup>28</sup> and PAD2<sup>35</sup> were associated with both  
368 trajectories but showed different patterns of expression (Fig 5g). 83 genes were  
369 differentially expressed only early in the trajectory of WT parasites. These genes include  
370 eight relating to ribosome biogenesis (including Midasin, PUF RNA binding protein 10, a  
371 putative RNA 3'-terminal phosphate cyclase, and the U3 snoRNA-associated protein UTP11).  
372 Other genes include pyruvate dehydrogenase E1 beta subunit, chromatin modifier NLP,  
373 TFIIH basal transcription factor complex helicase subunit, Exocyst complex component  
374 EXO99, Ras-related proteins RAB7 and RAB2B, and genes encoding hypothetical genes  
375 implicated in posttranscriptional regulation of gene expression (Tb927.6.2650,



376 Tb927.11.830 and Tb927.11.7590). 35 genes with early altered expression were associated  
377 with the truncated ZC3H20 KO development only. These include G2/M regulator WEE1,  
378 kinetoplastid-specific dual specificity phosphatase, Tb927.9.9990, and putative regulator of  
379 post-transcriptional gene expression, Tb927.8.3780.

380

381 In summary, comparing the differentiation of WT and differentiation incompetent ZC3H20  
382 KO cells through scRNA-seq has allowed the identification of a) the direct and indirect  
383 targets of ZC3H20 altered specifically during differentiation, b) the failure point of ZC3H20  
384 KO cells during the temporal profile of differentiation, and c) putative 'immediate early'  
385 regulators of differentiation.

386

## 387 Discussion

388

389 Although extensively studied, *T. brucei* differentiation from slender to stumpy bloodstream  
390 forms has remained difficult to dissect in detail due to the asynchronous nature of this life  
391 cycle transition. Here, we used oligopeptide induction of differentiation<sup>23</sup> in combination  
392 with scRNA-seq to deconvolve this process at the transcript level. This approach revealed  
393 several details of this process, including: the lack of a discrete intermediate transcriptome;  
394 the precise timing of cell cycle exit, immediately prior to late G1; the transient expression of  
395 several genes not identified by bulk-analysis; and the expression timing of known and  
396 putative differentiation factors during the developmental processes. Using scRNA-seq to  
397 study ZC3H20 KO parasites, we were also able to validate the essentiality of ZC3H20 for  
398 differentiation and position its action specifically at the major slender to stumpy transition  
399 point where the transcripts of this gene peak in abundance. Additionally, we were able to  
400 provide detailed gene expression patterns of both known and novel cell cycle regulated  
401 genes during the slender cell cycle.

402

403 Clustering WT *T. brucei* into groups of transcriptionally similar cells clearly identified two  
404 primary groups of slender- and stumpy parasites, each of which could be further classified  
405 into two sub-slender and sub-stumpy clusters (Fig 1). The transcript differences between  
406 clusters were mainly due to the cell cycle phase of slender cells and the stage of progression  
407 towards stumpy development (Fig 1 and 2) with gene expression changes highlighting a  
408 progressive transition to stumpy forms with relatively few genes transiently changing in  
409 abundance during development ( $n = 96$ ,  $FC > 2$ ). Thus, although discrimination of parasites  
410 between the extremes of the slender and slender morphotypes is possible microscopically,  
411 scRNA-seq analysis does not provide evidence for an intermediate form defined in  
412 molecular terms. Rather, short stumpy cells appear to emerge directly from the G1 phase of  
413 replicative slender cells (see below).

414

415 Previous bulk transcriptomics identified marker genes of the *T. brucei* cell cycle phases  
416 (early and late G1, S phase and G2/mitosis)<sup>69</sup>, allowing us to define the most likely cell cycle  
417 position of each cell (Fig 3). Phase identification of the cycling parasites showed that late G1  
418 stage cells are positioned at the start of the differentiation trajectory, consistent with a cell  
419 cycle receptive window<sup>74</sup>, followed by S and G2/M phase cells. Early G1 cells were enriched  
420 closer to stumpy clusters, though less clearly grouped, and stumpy clusters showed no clear  
421 cell cycle phase (Fig. 3, 4i, and 4j). Hence, the major switch in transcriptome from slender to  
422 stumpy occurs during G1 and, specifically, before cells enter late G1. Cells at other stages

423 may be committed to differentiation but not yet arrested, as predicted by modelling<sup>75</sup>. The  
424 inability to assign stumpy cells to any one proliferative cell cycle phase indicates these cells  
425 persist in a distinct G0, as opposed to simply pausing in G1. The signalled progression of *T.*  
426 *brucei* into G0 as stumpy forms provides a valuable, evolutionary divergent and tractable  
427 model for studying the conservation of quiescence signalling pathways, which are critical in  
428 many eukaryotic developmental processes<sup>76–80</sup>.

429  
430 We were additionally able to investigate the changes in transcript abundance during the  
431 proliferative slender cell cycle. Pseudotime analysis allowed us to profile the dynamic  
432 patterns of 1,897 genes found to be differentially expressed (Fig. 3), 332 of which had been  
433 previously identified in bulk RNA-seq analysis of synchronised procyclic *T. brucei*<sup>69</sup>. For  
434 example, we find CYC4, CYC6 and CYC8 peak at distinct points: CYC4 is a CYC2-like protein  
435 predicted to act in G1<sup>81</sup>, where the transcript levels increase in our analysis; CYC6<sup>62,82,83</sup> is  
436 known to regulate nuclear division and peaks post S-phase; and predicted, but untested,  
437 mitotic cyclin CYC8 peaks very precisely in late G1/S phase cells. Having not undergone  
438 either selectional or chemical synchronisation procedures<sup>69,84,85</sup>, this scRNA-seq derived cell  
439 cycle atlas provides a relatively unperturbed picture of cell cycle regulated events in greater  
440 detail than previously available, and suggests candidates for functional analysis. Distinctions  
441 between developmentally competent (pleomorphic) slender forms and adapted  
442 monomorphic forms used in previous studies may also be identified.

443  
444 Trajectory inference and differential expression analysis of the slender to stumpy transition  
445 revealed the relative order of events during differentiation of this asynchronous population.  
446 Initially, there was higher abundance of transcripts linked to proliferation (Fig. 1 and 2), with  
447 cells completing the later stages of the cell cycle during the early stages of the  
448 differentiation trajectory, consistent with phase scoring analysis (Fig. 2 and 3). Thereafter,  
449 metabolic changes and activation of the mitochondrion occurred as expected<sup>12,38</sup>. Finally  
450 expression of several kDNA encoded genes (cytochrome oxidase subunits I-III and  
451 cytochrome B) and procyclin surface protein encoding genes, EP1, EP2 and GPEET was  
452 observed, reflecting preparation for differentiation to procyclic forms<sup>12,15,17</sup>. These changes  
453 correlated well with bulk mRNA analysis of *in vivo* parasites<sup>12</sup>, validating the use of BHI as  
454 an *in vitro* model of stumpy development. Transient expression patterns of several genes,  
455 not discernible in bulk RNA-seq and proteomic studies, were also observed. These included  
456 several hypothetical genes, which may prove to be negative or positive regulators of  
457 differentiation. For instance, Tb927.8.7820 peaked precisely at the slender to stumpy  
458 transition point, is able to decrease mRNA stability<sup>68</sup> and is negatively targeted by RBP10<sup>86</sup>,  
459 which in our analysis decreased during differentiation consistent with its reported function  
460 in maintaining the bloodstream cell state<sup>39,40,86</sup>. Other transiently regulated transcripts were  
461 associated with cell cycle or mitochondrial control, including CYC6, required for nuclear  
462 division<sup>62,82,83</sup>, CIF1, a master regulator of cytokinesis<sup>43</sup> and MtHSP70B and MtHSP70C,  
463 which locate to the mitochondrial outer membrane<sup>87</sup> and may facilitating protein folding  
464 and targeting in the developing mitochondrion, matching the function of the human  
465 homolog, HSPA9<sup>88</sup>.

466  
467 Transiently upregulated genes also included the known differentiation regulator  
468 ZC3H20<sup>26,27,46</sup>, confirming that we were able to identify developmental regulators via their  
469 gene expression patterns. We postulated that scRNA-seq analysis may enable us to map

470 cells with diverse differentiation phenotypes onto our trajectory of WT differentiation, to  
471 assess the point at which genetically perturbed parasites fail to develop. We therefore  
472 exposed ZC3H20 KO parasites<sup>27</sup> to oligopeptides and confirmed that they remained  
473 proliferative (Fig. 4i, j) and failed to develop to stumpy forms (Fig. 4 d-h). Trajectory  
474 inference revealed that ZC3H20 KO cells downregulate transcripts also downregulated in  
475 oligopeptide stimulated WT parasites, including several glycolysis factors, cell cycle  
476 regulating genes, and posttranscriptional regulators of gene expression (Fig. 5). This  
477 downregulation may contribute to the reduced growth of ZC3H20 KO parasites when  
478 exposed to BHI. Interestingly, however, there was a clear distinction between this  
479 downregulation of slender transcripts and the increase of stumpy-associated transcripts,  
480 which ZC3H20 KO parasites failed to upregulate to WT levels, including 12/19 ZC3H20  
481 regulated mRNAs<sup>26</sup>. This suggests that ZC3H20 KO parasites perceive the differentiation  
482 signal and undergo early steps of differentiation, but do not commit to cell cycle exit and  
483 further development to stumpy forms. Comparing the divergence of WT and ZC3H20 KO  
484 cells in the trajectory of differentiation identified putative 'immediate early' regulators of  
485 commitment (Fig. F), including 28 hypothetical genes, four of which are known to regulate  
486 mRNA stability<sup>68</sup>. Further experimental work will be required to test the involvement of  
487 these genes in differentiation.

488

489 In summary, our data demonstrate that transcript level changes in parasites could be used  
490 to compile maps of both the cell cycle and the asynchronous slender to stumpy  
491 differentiation process. These can be mined to identify regulatory genes of individual events  
492 that make up each process. We further characterised mutant parasites by the same  
493 approach, positioning the site of action of one regulator (ZC3H20) in the developmental  
494 time course. If iterated for different genes, this method can be exploited to derive  
495 hierarchies of gene action during differentiation in this and other life cycle stages, species  
496 and development processes.

497

## 498 **Materials and methods**

499

### 500 ***Trypanosoma brucei* cell lines and culture**

501 *Trypanosoma brucei* EATRO 1125 AnTat1.1 90:13 parasites<sup>89</sup> were used as pleomorphic  
502 wild-type (WT) in all experiments. The ZC3H20 KO null parasites were previously generated  
503 in the same cell line transfected with plasmid pJ1399 (gifted by Dr. Jack Sunter), containing  
504 T7 polymerase and CRISPR/cas9, by replacement of both alleles of Tb927.7.2660 with  
505 blasticidin S deaminase<sup>27</sup>. All parasites were grown free from selective drugs in HMI-9  
506 medium<sup>90</sup> (Life technologies), supplemented with 10% foetal calf serum at 37°C, 5% CO<sub>2</sub>.  
507 For induction of differentiation, parasites were maintained below  $\sim 7 \times 10^5$  cells per ml for up  
508 to 5 days prior to addition of brain heart infusion (BHI) broth (Sigma Aldrich).

509

### 510 **Single cell RNA-sequencing**

511

512 For each scRNA-seq sample, four staggered cultures were set up over four days all  
513 maintained below  $\sim 8 \times 10^5$  cells per ml during the experiment by dilution. One culture was  
514 maintained free from BHI, and the remaining had 10% BHI added 24, 48 or 72 hr prior to  
515 sample preparation. Equal numbers of parasite from each culture were then combined to  
516 generate one pooled sample. 1.5 ml of the pooled culture was centrifuged, and the pelleted

517 cells washed twice with ice-cold 1 ml 1X PBS supplemented with 1% D-glucose (PSG) and  
518 0.04% Bovine Serum Albumin (BSA). Cells were then resuspended in ~ 500 ul PSG + 0.04%  
519 BSA, filtered with 40 µm Flowmi™ Tip Strainer (Merck) and adjusted to 1,000 cells/µl. In all  
520 steps, cells were centrifuged at 400 x g for 10 minutes. 15,000 cells (15 µl) from the mixed  
521 sample were loaded into the Chromium Controller (10x Genomics) to capture individual  
522 cells with unique barcoded beads. Libraries were prepared using the Chromium Single Cell 3'  
523 GEM, Library & Gel Bead Kit v3 (10x Genomics). Sequencing was performed with the  
524 NextSeq™ 500 platform (Illumina) to a depth of ~50,000 reads per cell. Library preparation  
525 and sequencing was performed by Glasgow Polyomics. For the first WT replicate  
526 experiment, *T. brucei* parasites were mixed 1:1 with *Leishmania mexicana* prepared by the  
527 same method (data unpublished), so the heterogenous doublet rate of 8.04% could be  
528 calculated.

529

### 530 **Read mapping and transcript counting**

531

532 The reference genome was compiled with Cell Ranger, to combined the TREU927 *T. brucei*  
533 nuclear reference genome<sup>91</sup> and *T. brucei* EATRO 1125 maxicircle kDNA sequence<sup>67</sup>. 3' UTR  
534 annotations were extended to increase the proportion of reads correctly assigned to  
535 annotated transcripts. 2500 bp immediately downstream of the stop code was assigned as  
536 the 3'UTR of each protein coding gene, unless the existing 3'UTR was longer than 2500 UTR  
537 in which case the full length was preserved. If the new 3'UTR was overlapped with other  
538 genome features (coding and non-coding) the UTR was truncated to remove the overlap.  
539 Reads were mapped and unique reads aligned to each annotated gene were counts and  
540 assigned to a cell barcode with the Cell Ranger count function (Supplementary data 1). Cell  
541 Ranger v3.0.2 (<http://software.10xgenomics.com/single-cell/overview/welcome>) was used  
542 with all default settings.

543

### 544 **Data processing and integration**

545

546 Count data for individual samples (WT 1, WT 2 and ZC3H20 KO) was processed separately  
547 prior to integration using the Seurat v3<sup>92</sup> and Scran v1.14.5<sup>93</sup> packages with R v3.6.1. The  
548 percentage of transcripts encoded on the maxi circle kDNA was calculated per cell, as cells  
549 with excess proportion of mitochondrial transcripts are likely to be poor quality<sup>94</sup>. The  
550 percentage of transcripts per cell encoding ribosomal RNA was also calculated, as high levels  
551 of rRNA indicate poor capture of polyadenylated transcripts. Low quality cells were removed  
552 by filtering for low total RNA (<1,000), low unique transcripts (< 250), high proportion of  
553 kDNA (> 2%) and high proportion of rRNA (>8%). Likely doublets were removed by filtering  
554 for high total RNA (> 4,000) and high total unique transcripts counts (> 2,500). After filtering  
555 rRNA transcripts were removed from each cell's transcriptome. For sample metrics, see  
556 Supplementary data 1.

557

558 Each filtered sample was log normalised individually using the quick cluster method from  
559 Scran<sup>95</sup>. To increase the robustness of variable genes selected for principle component (PC)  
560 analysis, we used two selection methods<sup>96</sup>; Scran, which uses log normalised transcript  
561 counts, and Seurat<sup>92</sup>, which uses raw transcript counts. We identified 3,000 genes with each  
562 method, selected those identified by both and removed VSG encoding genes<sup>97</sup> to avoid

563 clustering based on VSG expression. This left 2,029, 1,643 and 2,132 for WT 1, WT 2 and  
564 ZC3H20 KO samples, respectively (Supplementary data 1).

565

566 For integration of WT replicate samples, the Seurat v3 package was used<sup>92</sup>. Common  
567 variable features and integration anchors were identified, data for all genes integrated and  
568 scaled before the PCs were calculated using the common variable features. The first 8 PC  
569 dimensions each contributed > 0.1% of additional variance and were used to select anchors  
570 and integrate data. The effect of total RNA per cell was regressed when scaling data. The  
571 ZC3H20 KO cells were subsequently integrated with the previously integrated WT data using  
572 the steps described above, however STACAS v1.01.1 was used to identify integration  
573 anchors as the package is specialist for samples which don't fully overlap<sup>98</sup>.

574

### 575 **Cluster analysis and mark gene identification**

576

577 For clustering and marker gene analysis the Seurat v3 package was used<sup>92</sup>. Cells were  
578 plotted as dimensionality reduced UMAPs<sup>37</sup> and nearest neighbours were identified using 8  
579 dimensions. A range of clustering resolutions were trialled, with 0.4 resulting in the highest  
580 resolution clustering with significant mark genes identified for every cluster. Marker genes  
581 were identified for each cluster using MAST<sup>99</sup>. Only genes expressed in > 25% of the cells in  
582 the cluster, with a logFC of > 0.25 and adjusted p-value < 0.05 were considered marker  
583 genes. Gene ontology (GO) terms concerning biological processes were identified via the  
584 TriTrypDB<sup>100</sup> website (p < 0.05) and redundant terms removed with REVIGO<sup>101</sup>  
585 (allowed similarity = 0.5) and manually.

586

### 587 **Trajectory inference and pseudotime analysis**

588

589 For trajectory inference cells were plotted using PHATE maps<sup>60</sup> (using the same common  
590 viable genes as for PCA and 8 dimensions) and trajectories were identified using slingshot<sup>102</sup>,  
591 with the slender A cluster defined as the starting point. For cell cycle analysis, a circular  
592 trajectory was fitted as a principle curve<sup>103</sup>. To identify genes with expression patterns  
593 associated with progression of the trajectory, generalised additive models were fit using the  
594 tradeSeq package v1.3.18<sup>104</sup> with default parameters. The number of knots was tested to  
595 find 6 knots provide sufficient detail for the highest number of genes without overfitting.  
596 Differential expression analysis was performed with the tradeSeq associationTest function  
597 using default parameters, and significant genes (p-value < 0.05, FC > 2) were clustered using  
598 tradeSeq clusterExpressionPattern over 100 points on the trajectory. Gene clusters were  
599 merged into co-expressed modules using default setting except the merging cut-off was set  
600 to 0.95 to refine the number of modules from 58 to 9. For comparison with bulk RNA-seq  
601 analysis, the fold-change of stumpy vs slender expression for all genes was taken from data  
602 published by Silvester *et al.*<sup>12</sup>. All genes not found to be significant (p-value > 0.05) in bulk  
603 analysis were given a fold-change value of 0 for comparison with scRNA-seq data.

604

### 605 **Immunofluorescence**

606

607 Parasites were fixed in 1% paraformaldehyde for 10 minutes at room temperature (RT).  
608 Parasites were washed in 1X PBS and adhered to slide spread with Poly-L-lysine before  
609 being permeabilised with 0.1% Igepal in 1X PBS for 3 minutes. Cells were then blocked with

610 2% BSA in 1X PBS for 45 minutes at RT, stained with primary antibody (anti-PAD1<sup>35</sup> 1:1,000,  
611 EP1 procyclin [Cedar labs] 1:300) diluted in 0.2% BSA for 1 hr at RT. Three washes with 1X  
612 PBS were performed before incubating with secondary Alexa Fluor 488 (ThermoFisher  
613 Scientific) in 0.2% BSA for 1 hr at RT. Cells were washed a further three times before  
614 mounting with Fluoromount G with DAPI (Cambridge Bioscience, Southern Biotech).  
615 Imaging was performed with an AxioScope 2 fluorescence microscope (Zeiss) and a Zeiss  
616 Plan Aplanachromat 63x/1.40 oil objective.

617

#### 618 **Data availability**

619

620 Data can be sources via Supplementary Data Tables and the European Nucleotide Archive  
621 with accession number PRJEB41744. Wild-type scRNA-seq data can be explored using the  
622 interactive cell atlas (<http://cellatlas.mvls.gla.ac.uk/TbruceiBSF/>).

623

#### 624 **Code availability**

625 Code used to perform analysis described can be accessed at GitHub  
626 ([https://github.com/emma23ed/Tbrucei\\_scRNA-seq.git](https://github.com/emma23ed/Tbrucei_scRNA-seq.git)).

627

#### 628 **Extended data**

629

630 Supplementary Data 1. scRNA-seq sample metrics and variable genes.  
631 Supplementary Data 2. Analysis of wild-type differentiating *T. brucei*  
632 Supplementary Data 3. Cell cycle analysis of slender form *T. brucei*  
633 Supplementary Data 4. Analysis ZC3H20 KO *T. brucei*

634

635

636

637

638 **References**

639

- 640 1. Simarro, P. P., Cecchi, G., Paone, M., Franco, J. R., Diarra, A., Ruiz, J. A., Fèvre, E. M.,  
641 Courtin, F., Mattioli, R. C. & Jannin, J. G. The Atlas of human African trypanosomiasis:  
642 a contribution to global mapping of neglected tropical diseases. *Int. J. Health Geogr.*  
643 **9**, 57 (2010).
- 644 2. Giordani, F., Morrison, L. J., Rowan, T. G., DE Koning, H. P. & Barrett, M. P. The animal  
645 trypanosomiasis and their chemotherapy: a review. *Parasitology* **143**, 1862–1889  
646 (2016).
- 647 3. Fenn, K. & Matthews, K. R. The cell biology of *Trypanosoma brucei* differentiation.  
648 *Curr. Opin. Microbiol.* **10**, 539–546 (2007).
- 649 4. Reuner, B., Vassella, E., Yutzy, B. & Boshart, M. Cell density triggers slender to stumpy  
650 differentiation of *Trypanosoma brucei* bloodstream forms in culture. *Mol. Biochem.*  
651 *Parasitol.* **90**, 269–280 (1997).
- 652 5. Vassella, E., Reuner, B., Yutzy, B. & Boshart, M. Differentiation of African  
653 trypanosomes is controlled by a density sensing mechanism which signals cell cycle  
654 arrest via the cAMP pathway. *J. Cell Sci.* **110** ( Pt 2, 2661–71 (1997).
- 655 6. Robertson, M. Notes on the polymorphism of *Trypanosoma gambiense* in the blood  
656 and its relation to the exogenous cycle in *Glossina palpalis*. *Proc. R. Soc. London. Ser.*  
657 *B, Contain. Pap. a Biol. Character* **85**, 527–539 (1912).
- 658 7. The morphology of the trypanosome causing disease in man in Nyasaland. *Proc. R.*  
659 *Soc. London. Ser. B, Contain. Pap. a Biol. Character* **85**, 423–433 (1912).
- 660 8. Shapiro, S. Z., Naessens, J., Liesegang, B., Moloo, S. K. & Magondou, J. Analysis by flow  
661 cytometry of DNA synthesis during the life cycle of African trypanosomes. **41**, 313–23  
662 (1984).
- 663 9. Rico, E., Rojas, F., Mony, B. M., Szoor, B., MacGregor, P. & Matthews, K. R.  
664 Bloodstream form pre-adaptation to the tsetse fly in *Trypanosoma brucei*. *Front. Cell.*  
665 *Infect. Microbiol.* **3**, 78 (2013).
- 666 10. Silvester, E., McWilliam, K. R. & Matthews, K. R. The cytological events and molecular  
667 control of life cycle development of *Trypanosoma brucei* in the mammalian  
668 bloodstream. *Pathogens* **6**, (2017).
- 669 11. Turner, C. M., Aslam, N. & Dye, C. Replication, differentiation, growth and the  
670 virulence of *Trypanosoma brucei* infections. *Parasitology* **111** ( Pt 3, 289–300 (1995).
- 671 12. Silvester, E., Ivens, A. & Matthews, K. R. A gene expression comparison of  
672 *Trypanosoma brucei* and *Trypanosoma congolense* in the bloodstream of the  
673 mammalian host reveals species-specific adaptations to density-dependent  
674 development. *PLoS Negl. Trop. Dis.* **12**, e0006863 (2018).
- 675 13. Jensen, B. C., Sivam, D., Kifer, C. T., Myler, P. J. & Parsons, M. Widespread variation in  
676 transcript abundance within and across developmental stages of *Trypanosoma*  
677 *brucei*. **10**, 482 (2009).
- 678 14. Nilsson, D., Gunasekera, K., Mani, J., Osteras, M., Farinelli, L., Baerlocher, L., Roditi, I.  
679 & Ochsenreiter, T. Spliced Leader Trapping Reveals Widespread Alternative Splicing  
680 Patterns in the Highly Dynamic Transcriptome of *Trypanosoma brucei*. *PLoS Pathog.*  
681 **6**, e1001037 (2010).
- 682 15. Kabani, S., Fenn, K., Ross, A., Ivens, A., Smith, T. K., Ghazal, P. & Matthews, K.  
683 Genome-wide expression profiling of in vivo-derived bloodstream parasite stages and  
684 dynamic analysis of mRNA alterations during synchronous differentiation in

- 685 Trypanosoma brucei. *BMC Genomics* **10**, 427 (2009).
- 686 16. Naguleswaran, A., Doiron, N. & Roditi, I. RNA-Seq analysis validates the use of  
687 culture-derived Trypanosoma brucei and provides new markers for mammalian and  
688 insect life-cycle stages. *BMC Genomics* **19**, 227 (2018).
- 689 17. Queiroz, R., Benz, C., Fellenberg, K., Hoheisel, J. D. & Clayton, C. Transcriptome  
690 analysis of differentiating trypanosomes reveals the existence of multiple post-  
691 transcriptional regulons. *BMC Genomics* **10**, 495 (2009).
- 692 18. Dejung, M., Subota, I., Bucerius, F., Dindar, G., Freiwald, A., Engstler, M., Boshart, M.,  
693 Butter, F. & Janzen, C. J. Quantitative Proteomics Uncovers Novel Factors Involved in  
694 Developmental Differentiation of Trypanosoma brucei. *PLoS Pathog.* **12**, e1005439  
695 (2016).
- 696 19. Gunasekera, K., Wüthrich, D., Braga-Lagache, S., Heller, M. & Ochsenreiter, T.  
697 Proteome remodelling during development from blood to insect-form Trypanosoma  
698 brucei quantified by SILAC and mass spectrometry. *BMC Genomics* **13**, 556 (2012).
- 699 20. Lamour, N., Rivière, L., Coustou, V., Coombs, G. H., Barrett, M. P. & Bringaud, F.  
700 Proline metabolism in procyclic Trypanosoma brucei is down-regulated in the  
701 presence of glucose. *J. Biol. Chem.* **280**, 11902–11910 (2005).
- 702 21. Dean, S., Marchetti, R., Kirk, K. & Matthews, K. R. A surface transporter family  
703 conveys the trypanosome differentiation signal. **459**, 213–7 (2009).
- 704 22. Capewell, P., Monk, S., Ivens, A., Macgregor, P., Fenn, K., Walrad, P., Bringaud, F.,  
705 Smith, T. K. & Matthews, K. R. Regulation of Trypanosoma brucei Total and Polysomal  
706 mRNA during Development within Its Mammalian Host. **8**, e67069 (2013).
- 707 23. Rojas, F., Silvester, E., Young, J., Smith, T. K., Thompson, J., Matthews  
708 Correspondence, K. R., Milne, R., Tettey, M., Houston, D. R., Walkinshaw, M. D., Pé  
709 Rez-Pi, I., Auer, M., Denton, H. & Matthews, K. R. Oligopeptide Signaling through  
710 TbGPR89 Drives Trypanosome Quorum Sensing Article Oligopeptide Signaling through  
711 TbGPR89 Drives Trypanosome Quorum Sensing. *Cell* **176**, 306–317.e16 (2019).
- 712 24. Mony, B. M., MacGregor, P., Ivens, A., Rojas, F., Cowton, A., Young, J., Horn, D. &  
713 Matthews, K. Genome-wide dissection of the quorum sensing signalling pathway in  
714 Trypanosoma brucei. *Nature* **505**, 681–685 (2014).
- 715 25. McDonald, L., Cayla, M., Ivens, A., Mony, B. M., MacGregor, P., Silvester, E.,  
716 McWilliam, K. & Matthews, K. R. Non-linear hierarchy of the quorum sensing  
717 signalling pathway in bloodstream form African trypanosomes. *PLOS Pathog.* **14**,  
718 e1007145 (2018).
- 719 26. Liu, B., Kamanyi Marucha, K. & Clayton, C. The zinc finger proteins ZC3H20 and  
720 ZC3H21 stabilise mRNAs encoding membrane proteins and mitochondrial proteins in  
721 insect-form *Trypanosoma brucei*. *Mol. Microbiol.* **113**, 430–451 (2020).
- 722 27. Cayla, M., McDonald, L., Macgregor, P. & Matthews, K. R. An atypical DYRK kinase  
723 connects quorum-sensing with posttranscriptional gene regulation in Trypanosoma  
724 brucei. *Elife* **9**, 1–52 (2020).
- 725 28. Jones, N. G., Thomas, E. B., Brown, E., Dickens, N. J., Hammarton, T. C. & Mottram, J.  
726 C. Regulators of Trypanosoma brucei cell cycle progression and differentiation  
727 identified using a kinome-wide RNAi screen. *PLoS Pathog.* **10**, e1003886 (2014).
- 728 29. Kolodziejczyk, A. A., Kim, J. K., Svensson, V., Marioni, J. C. & Teichmann, S. A. The  
729 Technology and Biology of Single-Cell RNA Sequencing. *Molecular Cell* **58**, 610–620  
730 (2015).
- 731 30. Potter, S. S. Single-cell RNA sequencing for the study of development, physiology and



- 732 disease. *Nature Reviews Nephrology* (2018). doi:10.1038/s41581-018-0021-7  
733 31. Hedlund, E. & Deng, Q. Single-cell RNA sequencing: Technical advancements and  
734 biological applications. *Molecular Aspects of Medicine* (2018).  
735 doi:10.1016/j.mam.2017.07.003  
736 32. Müller, L. S. M., Cosentino, R. O., Förstner, K. U., Guizetti, J., Wedel, C., Kaplan, N.,  
737 Janzen, C. J., Arampatzi, P., Vogel, J., Steinbiss, S., Otto, T. D., Saliba, A.-E., Sebra, R. P.  
738 & Siegel, T. N. Genome organization and DNA accessibility control antigenic variation  
739 in trypanosomes. *Nature* (2018). doi:10.1038/s41586-018-0619-8  
740 33. Vigneron, A., O'Neill, M. B., Weiss, B. L., Savage, A. F., Campbell, O. C., Kamhawi, S.,  
741 Valenzuela, J. G. & Aksoy, S. Single-cell RNA sequencing of *Trypanosoma brucei* from  
742 tsetse salivary glands unveils metacyclogenesis and identifies potential transmission  
743 blocking antigens. *Proc. Natl. Acad. Sci. U. S. A.* **117**, 2613–2621 (2020).  
744 34. Savage, A. F., Kolev, N. G., Franklin, J. B., Vigneron, A., Aksoy, S. & Tschudi, C.  
745 Transcriptome Profiling of *Trypanosoma brucei* Development in the Tsetse Fly Vector  
746 *Glossina morsitans*. *PLoS One* **11**, e0168877 (2016).  
747 35. Dean, S., Marchetti, R., Kirk, K. & Matthews, K. R. A surface transporter family  
748 conveys the trypanosome differentiation signal. *Nature* **459**, 213–217 (2009).  
749 36. Zheng, G. X. Y., Terry, J. M., Belgrader, P., Ryvkin, P., Bent, Z. W., Wilson, R., Ziraldo, S.  
750 B., Wheeler, T. D., McDermott, G. P., Zhu, J., Gregory, M. T., Shuga, J., Montesclaros,  
751 L., Underwood, J. G., Masquelier, D. A., Nishimura, S. Y., Schnall-Levin, M., Wyatt, P.  
752 W., Hindson, C. M., *et al.* Massively parallel digital transcriptional profiling of single  
753 cells. *Nat. Commun.* **8**, 1–12 (2017).  
754 37. McInnes, L., Healy, J. & Melville, J. UMAP: Uniform Manifold Approximation and  
755 Projection for Dimension Reduction. (2018).  
756 38. Vertommen, D., Van, R. J., Szikora, J.-P., Rider, M. H., Michels, P. A. M. & Opperdoes,  
757 F. R. Differential expression of glycosomal and mitochondrial proteins in the two  
758 major life-cycle stages of *Trypanosoma brucei*. **158**, 189–201 (2008).  
759 39. De Pablos, L. M., Kelly, S., Nascimento, J. D. F., Sunter, J. & Carrington, M.  
760 Characterization of RBP9 and RBP10, two developmentally regulated RNA-binding  
761 proteins in *Trypanosoma brucei*. *Open Biol.* **7**, (2017).  
762 40. Wurst, M., Seliger, B., Jha, B. A., Klein, C., Queiroz, R. & Clayton, C. Expression of the  
763 RNA recognition motif protein RBP10 promotes a bloodstream-form transcript  
764 pattern in *Trypanosoma brucei*. *Mol. Microbiol.* **83**, 1048–1063 (2012).  
765 41. Sanchez, M. A., Drutman, S., Van Ampting, M., Matthews, K. & Landfear, S. M. A novel  
766 purine nucleoside transporter whose expression is up-regulated in the short stumpy  
767 form of the *Trypanosoma brucei* life cycle. *Mol. Biochem. Parasitol.* (2004).  
768 doi:10.1016/j.molbiopara.2004.04.009  
769 42. Spoerri, I., Chadwick, R., Renggli, C. K., Matthews, K., Roditi, I. & Burkard, G. Role of  
770 the stage-regulated nucleoside transporter TbNT10 in differentiation and adenosine  
771 uptake in *Trypanosoma brucei*. *Mol. Biochem. Parasitol.* (2007).  
772 doi:10.1016/j.molbiopara.2007.04.006  
773 43. Zhou, Q., An, T., Pham, K. T. M., Hu, H. & Li, Z. The CIF1 protein is a master  
774 orchestrator of trypanosome cytokinesis that recruits several cytokinesis regulators  
775 to the cytokinesis initiation site. *J. Biol. Chem.* **293**, 16177–16192 (2018).  
776 44. Inoue, M., Nakamura, Y., Yasuda, K., Yasaka, N., Hara, T., Schnauffer, A., Stuart, K. &  
777 Fukuma, T. The 14-3-3 proteins of *Trypanosoma brucei* function in motility,  
778 cytokinesis, and cell cycle. *J. Biol. Chem.* **280**, 14085–14096 (2005).

- 779 45. Carrington, M., Carnall, N., Crow, M. S., Gaud, A., Redpath, M. B., Wasunna, C. L. &  
780 Webb, H. The properties and function of the glycosylphosphatidylinositol-  
781 phospholipase C in *Trypanosoma brucei*. *Mol. Biochem. Parasitol.* **91**, 153–164 (1998).
- 782 46. Ling, A. S., Trotter, J. R. & Hendriks, E. F. A zinc finger protein, TbZC3H20, stabilizes  
783 two developmentally regulated mRNAs in trypanosomes. *J. Biol. Chem.* **286**, 20152–  
784 20162 (2011).
- 785 47. Field, H., Farjah, M., Pal, A., Gull, K. & Field, M. C. Complexity of trypanosomatid  
786 endocytosis pathways revealed by Rab4 and Rab5 isoforms in *Trypanosoma brucei*. *J.*  
787 *Biol. Chem.* **273**, 32102–32110 (1999).
- 788 48. Van Hellemond, J. J., Opperdoes, F. R. & Tielens, A. G. M. The extraordinary  
789 mitochondrion and unusual citric acid cycle in *Trypanosoma brucei*. *Biochem. Soc.*  
790 *Trans.* **33**, 967–971 (2005).
- 791 49. ELSE, A. J., HOUGH, D. W. & DANSON, M. J. Cloning, sequencing, and expression of  
792 *Trypanosoma brucei* dihydrolipoamide dehydrogenase. *Eur. J. Biochem.* **212**, 423–429  
793 (1993).
- 794 50. Vickerman, K. Polymorphism and mitochondrial activity in sleeping sickness  
795 trypanosomes. *Nature* (1965). doi:10.1038/208762a0
- 796 51. Tyler, K. M., Matthews, K. R. & Gull, K. The bloodstream differentiation-division of  
797 *Trypanosoma brucei* studied using mitochondrial markers. *Proc. R. Soc. B Biol. Sci.*  
798 (1997). doi:10.1098/rspb.1997.0205
- 799 52. Estévez, A. M., Kierszenbaum, F., Wirtz, E., Bringaud, F., Grunstein, J. & Simpson, L.  
800 Knockout of the glutamate dehydrogenase gene in bloodstream *Trypanosoma brucei*  
801 in culture has no effect on editing of mitochondrial mRNAs. *Mol. Biochem. Parasitol.*  
802 **100**, 5–17 (1999).
- 803 53. Gupta, S. K., Chikne, V., Eliaz, D., Tkacz, I. D., Naboishchikov, I., Carmi, S., Ben-Asher,  
804 H. W. & Michaeli, S. Two splicing factors carrying serine-arginine motifs, TSR1 and  
805 TSR1IP, regulate splicing, mRNA stability, and rRNA processing in *Trypanosoma*  
806 *brucei*. *RNA Biol.* **11**, 715–731 (2014).
- 807 54. Jensen, B. C., Brekken, D. L., Randall, A. C., Kifer, C. T. & Parsons, M. Species specificity  
808 in ribosome biogenesis: A nonconserved phosphoprotein is required for formation of  
809 the large ribosomal subunit in *Trypanosoma brucei*. *Eukaryot. Cell* **4**, 30–35 (2005).
- 810 55. Chou, S., Jensen, B. C., Parsons, M., Alber, T. & Grundner, C. The *Trypanosoma brucei*  
811 life cycle switch TbPTP1 is structurally conserved and dephosphorylates the nucleolar  
812 protein NOPP44/46. **285**, 22075–81 (2010).
- 813 56. Parsons, M., Ledbetter, J. A., Schieven, G. L., Nel, A. E. & Kanner, S. B. Developmental  
814 regulation of pp44/46, tyrosine-phosphorylated proteins associated with  
815 tyrosine/serine kinase activity in *Trypanosoma brucei*. *Mol. Biochem. Parasitol.*  
816 (1994). doi:10.1016/0166-6851(94)90009-4
- 817 57. Shan, F., Mei, S., Zhang, J., Zhang, X., Xu, C., Liao, S. & Tu, X. A telomerase subunit  
818 homolog La protein from *Trypanosoma brucei* plays an essential role in ribosomal  
819 biogenesis. *FEBS J.* **286**, 3129–3147 (2019).
- 820 58. Hendriks, E. F., Robinson, D. R., Hinkins, M. & Matthews, K. R. A novel CCCH protein  
821 which modulates differentiation of *Trypanosoma brucei* to its procyclic form. **20**,  
822 6700–11 (2001).
- 823 59. Droll, D., Minia, I., Fadda, A., Singh, A., Stewart, M., Queiroz, R. & Clayton, C. Post-  
824 Transcriptional Regulation of the Trypanosome Heat Shock Response by a Zinc Finger  
825 Protein. *PLoS Pathog.* **9**, e1003286 (2013).

- 826 60. Moon, K. R., van Dijk, D., Wang, Z., Gigante, S., Burkhardt, D. B., Chen, W. S., Yim, K.,  
827 Elzen, A. van den, Hirn, M. J., Coifman, R. R., Ivanova, N. B., Wolf, G. & Krishnaswamy,  
828 S. Visualizing structure and transitions in high-dimensional biological data. *Nat.*  
829 *Biotechnol.* **37**, 1482–1492 (2019).
- 830 61. Sienkiewicz, N., Jarosławski, S., Wyllie, S. & Fairlamb, A. H. Chemical and genetic  
831 validation of dihydrofolate reductase-thymidylate synthase as a drug target in African  
832 trypanosomes. *Mol. Microbiol.* **69**, 520–533 (2008).
- 833 62. Li, Z. & Wang, C. C. A PHO80-like cyclin and a B-type cyclin control the cell cycle of the  
834 procyclic form of *Trypanosoma brucei*. *J. Biol. Chem.* **278**, 20652–20658 (2003).
- 835 63. Portman, N. & Gull, K. Identification of paralogous life-cycle stage specific cytoskeletal  
836 proteins in the parasite *Trypanosoma brucei*. *PLoS One* **9**, (2014).
- 837 64. Olego-Fernandez, S., Vaughan, S., Shaw, M. K., Gull, K. & Ginger, M. L. Cell  
838 Morphogenesis of *Trypanosoma brucei* Requires the Paralogous, Differentially  
839 Expressed Calpain-related Proteins CAP5.5 and CAP5.5V. *Protist* (2009).  
840 doi:10.1016/j.protis.2009.05.003
- 841 65. Colasante, C., Peña Diaz, P., Clayton, C. & Voncken, F. Mitochondrial carrier family  
842 inventory of *Trypanosoma brucei brucei*: Identification, expression and subcellular  
843 localisation. *Mol. Biochem. Parasitol.* **167**, 104–117 (2009).
- 844 66. Florini, F., Naguleswaran, A., Gharib, W. H., Bringaud, F. & Roditi, I. Unexpected  
845 diversity in eukaryotic transcription revealed by the retrotransposon hotspot family  
846 of *Trypanosoma brucei*. *Nucleic Acids Res.* **47**, 1725–1739 (2019).
- 847 67. Cooper, S., Wadsworth, E. S., Ochsenreiter, T., Ivens, A., Savill, N. J. & Schnauffer, A.  
848 Assembly and annotation of the mitochondrial minicircle genome of a differentiation-  
849 competent strain of *Trypanosoma brucei*. *Nucleic Acids Res.* **47**, 11304–11325 (2019).
- 850 68. Erben, E. D., Fadda, A., Lueong, S., Hoheisel, J. D. & Clayton, C. A Genome-Wide  
851 Tethering Screen Reveals Novel Potential Post-Transcriptional Regulators in  
852 *Trypanosoma brucei*. *PLoS Pathog.* **10**, e1004178 (2014).
- 853 69. Archer, S. K., Inchaustegui, D., Queiroz, R. & Clayton, C. The Cell Cycle Regulated  
854 Transcriptome of *Trypanosoma brucei*. *PLoS One* **6**, e18425 (2011).
- 855 70. Marques, C. A., Tiengwe, C., Lemgruber, L., Damasceno, J. D., Scott, A., Paape, D.,  
856 Marcello, L. & McCulloch, R. Diverged composition and regulation of the  
857 *Trypanosoma brucei* origin recognition complex that mediates DNA replication  
858 initiation. *Nucleic Acids Res.* **44**, 4763–84 (2016).
- 859 71. Li, Z. & Wang, C. C. Changing roles of aurora-B kinase in two life cycle stages of  
860 *Trypanosoma brucei*. *Eukaryot. Cell* (2006). doi:10.1128/EC.00129-06
- 861 72. Kaufmann, D., Gassen, A., Maiser, A., Leonhardt, H. & Janzen, C. J. Regulation and  
862 spatial organization of PCNA in *Trypanosoma brucei*. *Biochem. Biophys. Res. Commun.*  
863 **419**, 698–702 (2012).
- 864 73. D’Archivio, S. & Wickstead, B. Trypanosome outer kinetochore proteins suggest  
865 conservation of chromosome segregation machinery across eukaryotes. *J. Cell Biol.*  
866 **216**, 379–391 (2017).
- 867 74. Matthews, K. R. & Gull, K. Evidence for an interplay between cell cycle progression  
868 and the initiation of differentiation between life cycle forms of African trypanosomes.  
869 *J. Cell Biol.* (1994). doi:10.1083/jcb.125.5.1147
- 870 75. MacGregor, P., Savill, N. J., Hall, D. & Matthews, K. R. Transmission stages dominate  
871 trypanosome within-host dynamics during chronic infections. *Cell Host Microbe*  
872 (2011). doi:10.1016/j.chom.2011.03.013

- 873 76. Orford, K. W. & Scadden, D. T. Deconstructing stem cell self-renewal: Genetic insights  
874 into cell-cycle regulation. *Nature Reviews Genetics* (2008). doi:10.1038/nrg2269
- 875 77. Heyman, J., Kumpf, R. P. & De Veylder, L. A quiescent path to plant longevity. *Trends*  
876 *in Cell Biology* (2014). doi:10.1016/j.tcb.2014.03.004
- 877 78. Gray, J. V., Petsko, G. A., Johnston, G. C., Ringe, D., Singer, R. A. & Werner-  
878 Washburne, M. “Sleeping Beauty”: Quiescence in *Saccharomyces cerevisiae*.  
879 *Microbiol. Mol. Biol. Rev.* (2004). doi:10.1128/membr.68.2.187-206.2004
- 880 79. Sagot, I. & Laporte, D. The cell biology of quiescent yeast – a diversity of individual  
881 scenarios. *Journal of Cell Science* (2019). doi:10.1242/jcs.213025
- 882 80. de Virgilio, C. The essence of yeast quiescence. *FEMS Microbiology Reviews* (2012).  
883 doi:10.1111/j.1574-6976.2011.00287.x
- 884 81. Hammarton, T. C. Cell cycle regulation in *Trypanosoma brucei*. *Mol. Biochem.*  
885 *Parasitol.* **153**, 1–8 (2007).
- 886 82. Hayashi, H. & Akiyoshi, B. Degradation of cyclin B is critical for nuclear division in  
887 *Trypanosoma brucei*. *Biol. Open* (2018). doi:10.1242/bio.031609
- 888 83. Hammarton, T. C., Clark, J., Douglas, F., Boshart, M. & Mottram, J. C. Stage-specific  
889 differences in cell cycle control in *Trypanosoma brucei* revealed by RNA interference  
890 of a mitotic cyclin. *J. Biol. Chem.* (2003). doi:10.1074/jbc.M300813200
- 891 84. Forsythe, G. R., McCulloch, R. & Hammarton, T. C. Hydroxyurea-induced  
892 synchronisation of bloodstream stage *Trypanosoma brucei*. *Mol. Biochem. Parasitol.*  
893 (2009). doi:10.1016/j.molbiopara.2008.12.008
- 894 85. Benz, C., Dondelinger, F., McKean, P. G. & Urbaniak, M. D. Cell cycle synchronisation  
895 of *Trypanosoma brucei* by centrifugal counter-flow elutriation reveals the timing of  
896 nuclear and kinetoplast DNA replication. *Sci. Rep.* **7**, 17599 (2017).
- 897 86. Mugo, E. & Clayton, C. Expression of the RNA-binding protein RBP10 promotes the  
898 bloodstream-form differentiation state in *Trypanosoma brucei*. *PLoS Pathog.* (2017).  
899 doi:10.1371/journal.ppat.1006560
- 900 87. Niemann, M., Wiese, S., Mani, J., Chanfon, A., Jackson, C., Meisinger, C., Warscheid,  
901 B. & Schneider, A. Mitochondrial outer membrane proteome of *trypanosoma brucei*  
902 reveals novel factors required to maintain mitochondrial morphology. *Mol. Cell.*  
903 *Proteomics* **12**, 515–528 (2013).
- 904 88. Deocaris, C. C., Kaul, S. C. & Wadhwa, R. On the brotherhood of the mitochondrial  
905 chaperones mortalin and heat shock protein 60. in *Cell Stress and Chaperones* **11**,  
906 116–128 (Cell Stress Chaperones, 2006).
- 907 89. Engstler, M. & Boshart, M. Cold shock and regulation of surface protein trafficking  
908 convey sensitization to inducers of stage differentiation in *Trypanosoma brucei*.  
909 *Genes Dev.* **18**, 2798–2811 (2004).
- 910 90. Hirumi, H. & Hirumi, K. Continuous cultivation of *Trypanosoma brucei* blood stream  
911 forms in a medium containing a low concentration of serum protein without feeder  
912 cell layers. *J. Parasitol.* **75**, 985–9 (1989).
- 913 91. Berriman, M. The Genome of the African Trypanosome *Trypanosoma brucei*. *Science*  
914 (80- ). **309**, 416–422 (2005).
- 915 92. Stuart, T., Butler, A., Hoffman, P., Hafemeister, C., Papalexi, E., Mauck, W. M., Hao, Y.,  
916 Stoeckius, M., Smibert, P. & Satija, R. Comprehensive Integration of Single-Cell Data.  
917 *Cell* (2019). doi:10.1016/J.CELL.2019.05.031
- 918 93. Lun, A. T. L., McCarthy, D. J. & Marioni, J. C. A step-by-step workflow for low-level  
919 analysis of single-cell RNA-seq data [version 1; referees: 5 approved with

- 920 reservations]. *F1000Research* **5**, (2016).
- 921 94. Ilicic, T., Kim, J. K., Kolodziejczyk, A. A., Bagger, F. O., McCarthy, D. J., Marioni, J. C. &  
922 Teichmann, S. A. Classification of low quality cells from single-cell RNA-seq data.  
923 *Genome Biol.* **17**, 29 (2016).
- 924 95. Lun, A. T. L., Bach, K. & Marioni, J. C. Pooling across cells to normalize single-cell RNA  
925 sequencing data with many zero counts. *Genome Biol.* **17**, 75 (2016).
- 926 96. Yip, S. H., Sham, P. C. & Wang, J. Evaluation of tools for highly variable gene discovery  
927 from single-cell RNA-seq data. *Brief. Bioinform.* **20**, 1583–1589 (2018).
- 928 97. Cross, G. A. M., Kim, H.-S. & Wickstead, B. Capturing the variant surface glycoprotein  
929 repertoire (the VSGnome) of *Trypanosoma brucei* Lister 427. *Mol. Biochem. Parasitol.*  
930 **195**, 59–73 (2014).
- 931 98. Andreatta, M. & Carmona, S. J. STACAS: Sub-Type Anchor Correction for Alignment in  
932 Seurat to integrate single-cell RNA-seq data. *Bioinformatics* (2020).  
933 doi:10.1093/bioinformatics/btaa755
- 934 99. Finak, G., McDavid, A., ... M. Y.-G. & 2015, undefined. MAST: a flexible statistical  
935 framework for assessing transcriptional changes and characterizing heterogeneity in  
936 single-cell RNA sequencing data. *genomebiology.biomedcentral.com*
- 937 100. Aslett, M., Aurrecochea, C., Berriman, M., Brestelli, J., Brunk, B. P., Carrington, M.,  
938 Depledge, D. P., Fischer, S., Gajria, B., Gao, X., Gardner, M. J., Gingle, A., Grant, G.,  
939 Harb, O. S., Heiges, M., Hertz-Fowler, C., Houston, R., Innamorato, F., Iodice, J., *et al.*  
940 TriTrypDB: a functional genomic resource for the Trypanosomatidae. *Nucleic Acids*  
941 *Res.* **38**, D457–D462 (2010).
- 942 101. Supek, F., Bošnjak, M., Škunca, N. & Šmuc, T. Revigo summarizes and visualizes long  
943 lists of gene ontology terms. *PLoS One* (2011). doi:10.1371/journal.pone.0021800
- 944 102. Street, K., Risso, D., Fletcher, R. B., Das, D., Ngai, J., Yosef, N., Purdom, E. & Dudoit, S.  
945 Slingshot: cell lineage and pseudotime inference for single-cell transcriptomics. *BMC*  
946 *Genomics* **19**, 477 (2018).
- 947 103. Hastie, T. & Stuetzle, W. Principal curves. *J. Am. Stat. Assoc.* (1989).  
948 doi:10.1080/01621459.1989.10478797
- 949 104. Van den Berge, K., Roux de Bézieux, H., Street, K., Saelens, W., Cannoodt, R., Saeys,  
950 Y., Dudoit, S. & Clement, L. Trajectory-based differential expression analysis for  
951 single-cell sequencing data. *Nat. Commun.* (2020). doi:10.1038/s41467-020-14766-3  
952  
953

954

955 **Acknowledgements**

956

957 We thank J. Galbraith and P. Herzyk (Glasgow Polyomics, University of Glasgow) for their  
958 guidance, library preparation and sequencing. We also thank F. Rojas and M. Cayla  
959 (University of Edinburgh) for their guidance and provision of cell lines. This work was  
960 supported by the Wellcome Trust (218648/Z/19/Z to E.M.B., 104111/Z/14/ZR to T.D.O. and  
961 103740/Z14/Z to K.R.M.), Wellcome Trust Institutional Strategic Support Fund (ISSF3)  
962 awards held at the University of Glasgow (204820/Z/16/Z awarded to E.M.B. and R.M.), and  
963 the BBSRC-FAPESP (BB/N016165/1 to R.M).

964

965 **Author Contributions**

966

967 Methodology: E.M.B., R.M., T.D.O, and K.R.M. Data collection: E.M.B. Bioinformatic data  
968 analysis: E.M.B and T.D.O. Single cell atlas was created by T.D.O. All authors participated in  
969 discussions related to this work. All authors wrote, reviewed and approved the manuscript.

970

971

972

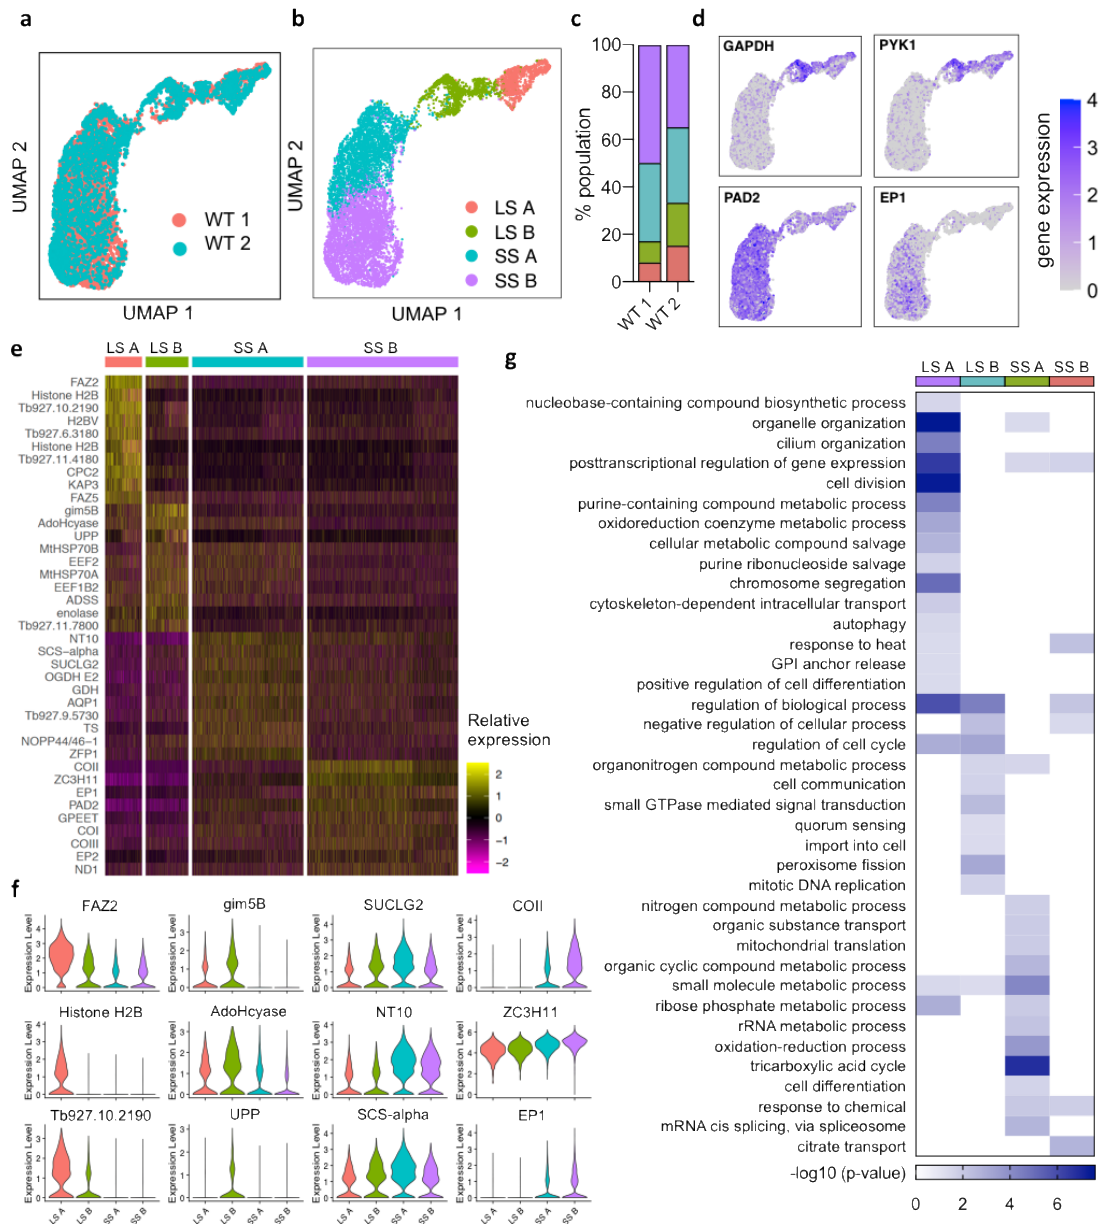

973

974

**Figure 1. Sequencing of individual *T. brucei* transcriptomes during bloodstream**

**differentiation in vitro. a)** Low dimensional plot (UMAP) of each cell after filtering. Each

976 point is the transcriptome of one cell positioned according to similarity with neighboring

977 transcriptomes, coloured by replicate experiment. **b)** UMAP of WT parasites from both

978 replicates, coloured by cluster: Long slender (LS) A, LS B, short stumpy (SS) A and SS B. **c)**

979 Percentage of parasites in each cluster for each replicate experiment. **d)** UMAP of integrated

980 WT parasites coloured by transcript counts for two SL marker genes (GAPDH; Tb927.6.4280

981 and PYK1; Tb927.10.14140) and stumpy marker genes (PAD2; Tb927.7.5940 and EP1;

982 Tb927.10.10260). Scale shows raw transcript count per cell. **e)** Heatmap showing relative

983 expression of the top 10 unique marker genes of each cluster identified in **c)**. Each row is one

984 gene coloured by relative expression. Where no gene name or symbol was available, the

985 gene ID is shown. Each column is one cell grouped according to cluster. **f)** Violin plots

986 showing the expression of each of the top 3 unique marker genes per cell, divided by cluster.

987 X-axis shows the raw transcript count per cell. **g)** Gene ontology (GO) enrichment for

988 biological process linked with marker genes for each cluster. Scale shows the  $-\log(\text{adjusted p-}$

989 value) for each term enrichment per cluster.

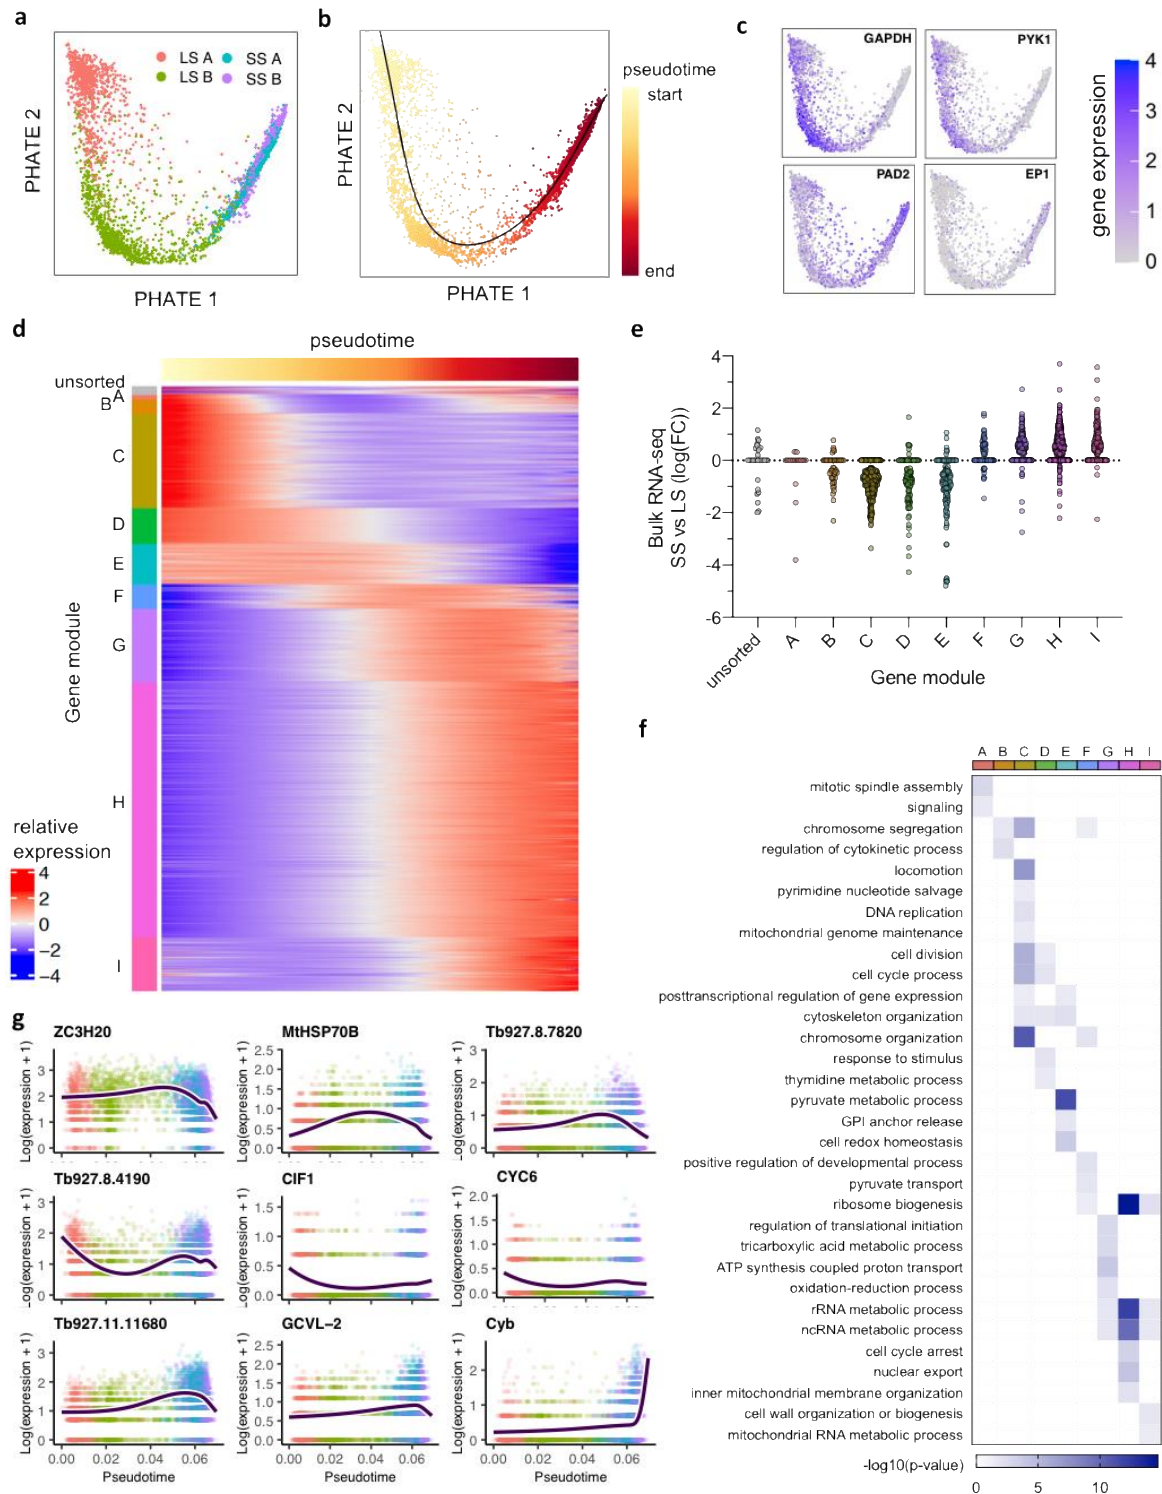

990  
991

992 **Figure 2. Pseudotime analysis reveals dynamic gene expression in slender to stumpy**  
 993 **differentiation.** PHATE plots of individual parasite transcriptomes coloured by (a) cluster  
 994 identity, (b) pseudotime values and (c) raw marker gene transcript count as in 1e. d)  
 995 Heatmap plotting relative expression of genes significantly ( $>0.05$  adjusted p value,  $FC > 2$ )  
 996 associated with the trajectory (2001 genes). Top track shows pseudotime. Genes are  
 997 clustered by expression pattern over pseudotime into 9 modules of co-expressed gene,  
 998 indicated to the left. Unsorted genes are indicated (grey). e) Fold change of differentiation  
 999 associated genes in bulk in vivo-derived RNA-seq data, comparing stumpy (peak parasitemia)



1000 and slender (low parasitemia). Each point is one gene, grouped and coloured according to  
1001 the co-expressed module identified in d. f) Biological progress gene ontology (GO) term  
1002 analysis of differentiation associated genes grouped by co-expressed module. g) Gene  
1003 expression ( $\log(\text{transcript count} + 1)$ ) across pseudotime from slender to stumpy  
1004 differentiation of 9 genes identified as transiently upregulated (ZC3H20, MtHSP70B,  
1005 Tb927.8.7820), transiently down regulated (Tb927.8.4190, CIF1, CYC6) or unsorted  
1006 (Tb927.11.11680, GCVL-2, Cyb). Each point is one cell coloured by cluster as in a. Dark blue  
1007 line is smoothed average expression across pseudotime.  
1008

1009

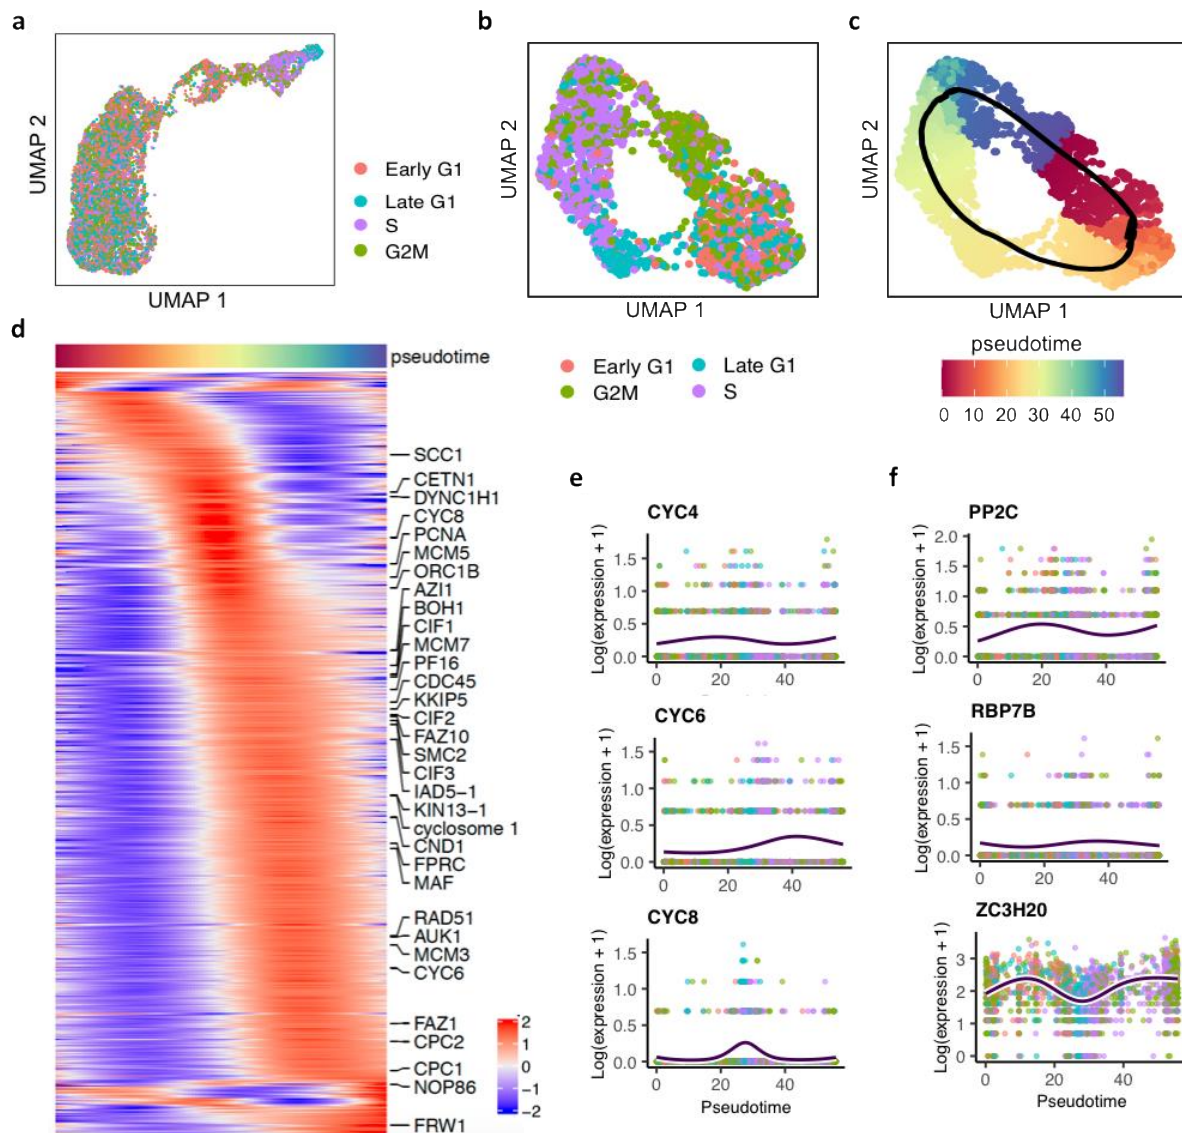

1010

1011 **Figure 3. Identification of genes differentially expressed during the slender form cell cycle.**

1012 **a)** UMAP of WT cells coloured by assigned cell cycle phase. **b)** UMAP of re-plotted slender A

1013 and slender B clusters of cells, using genes variable within the slender population. **c)** UMAP

1014 of slender cells coloured by assigned pseudotime value. The black line indicates the inferred

1015 circular trajectory. **d)** Heatmap of relative expression of genes significantly differentially

1016 expressed ( $p$ -value  $< 0.05$ ), with FC  $> 2$  over the cell cycle. Genes associated with the GO term

1017 "cell cycle process" are labelled. **e)** Expression (y-axis;  $\log(\text{expression} + 1)$ ) of 3 cyclin genes

1018 (CYC4, CYC6 and CYC8) and cell cycle pseudotime (x-axis). Each point is one cell coloured by

1019 cell cycle phase and dark blue line shows average expression over pseudotime. **f)** Expression

1020 of three genes previously shown to regulate stumpy formation. Labels as in **e**.

1021

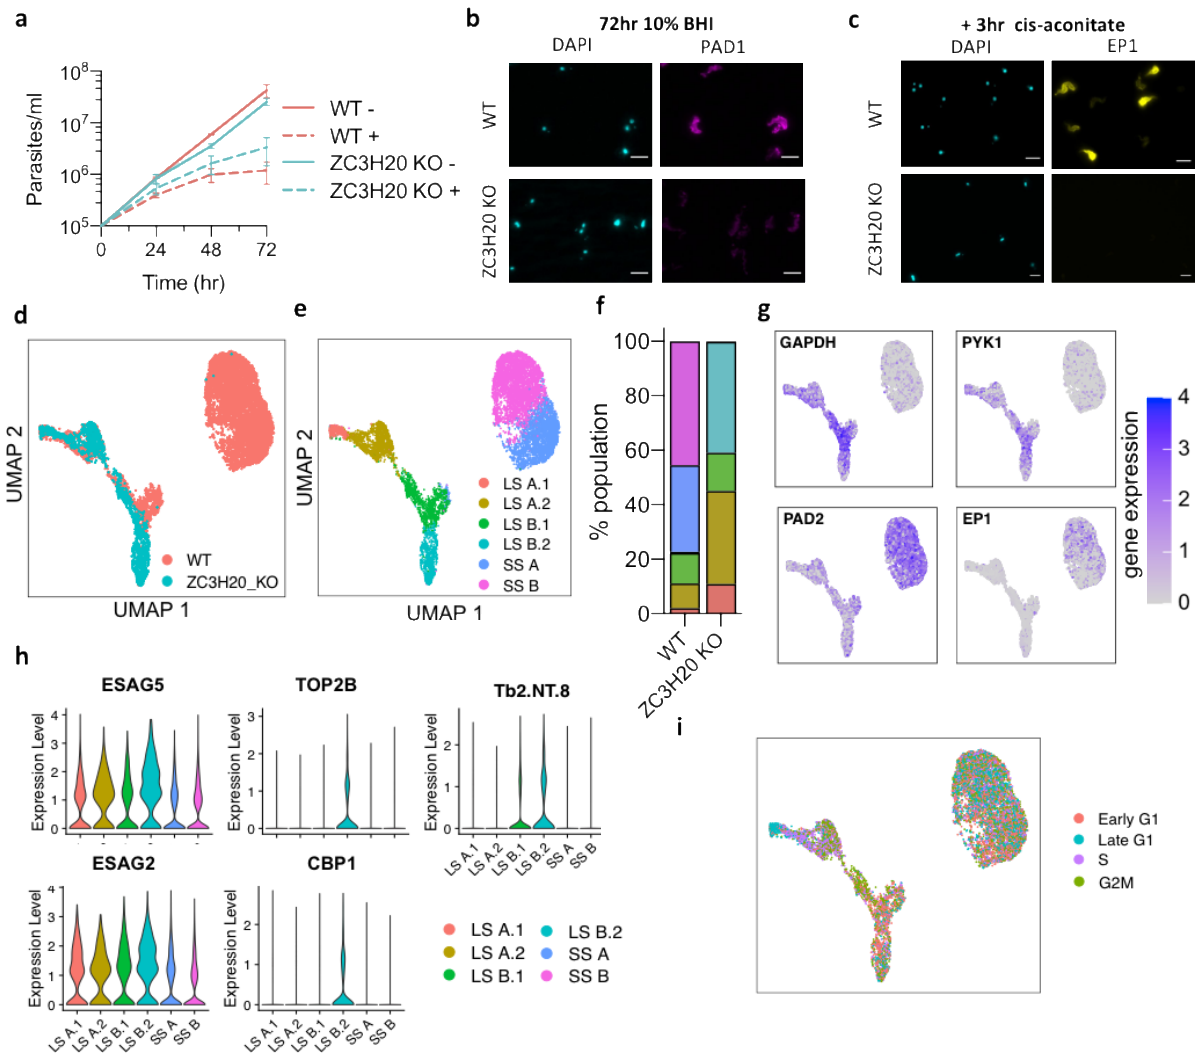

1022  
1023

1024 **Figure 4. scRNA-seq analysis of differentiation incompetent ZC3H20 KO *T. brucei* parasites.**  
 1025 Cumulative growth of WT (red) and ZC3H20 KO (blue) *T. brucei* in culture with (dashed line)  
 1026 and without (solid line) 10% BHI broth. Error bars, SD of three independent replicates. **b)**  
 1027 Staining of WT and ZC3H20 KO parasites with anti-PAD1 antibody after 72 hr incubation with  
 1028 10% BHI broth. Scale, 5  $\mu$ m. **c)** EP1 staining of WT and ZC3H20 KO after 3 hr treatment with  
 1029 cis-aconitate to induced differentiation of 72hr BHI + samples into procyclic forms. Scale, 5  
 1030  $\mu$ m. UMAP plots of integrated WT cells (red) and ZC3H20 KO cells (blue) coloured by cell  
 1031 type **(d)** and by cluster identification **(e)**. **f)** Proportion of cells in each cluster identified in  
 1032 integrated WT and ZC3H20 KO cells. **g)** UMAP of WT and ZC3H20 KO parasites coloured by  
 1033 transcript count of marker genes as in **1e**. **h)** Violin plots of top slender B.2 marker genes. **i)**  
 1034 UMAP of integrated WT and ZC3H20 KO cells coloured by cell cycle phase.

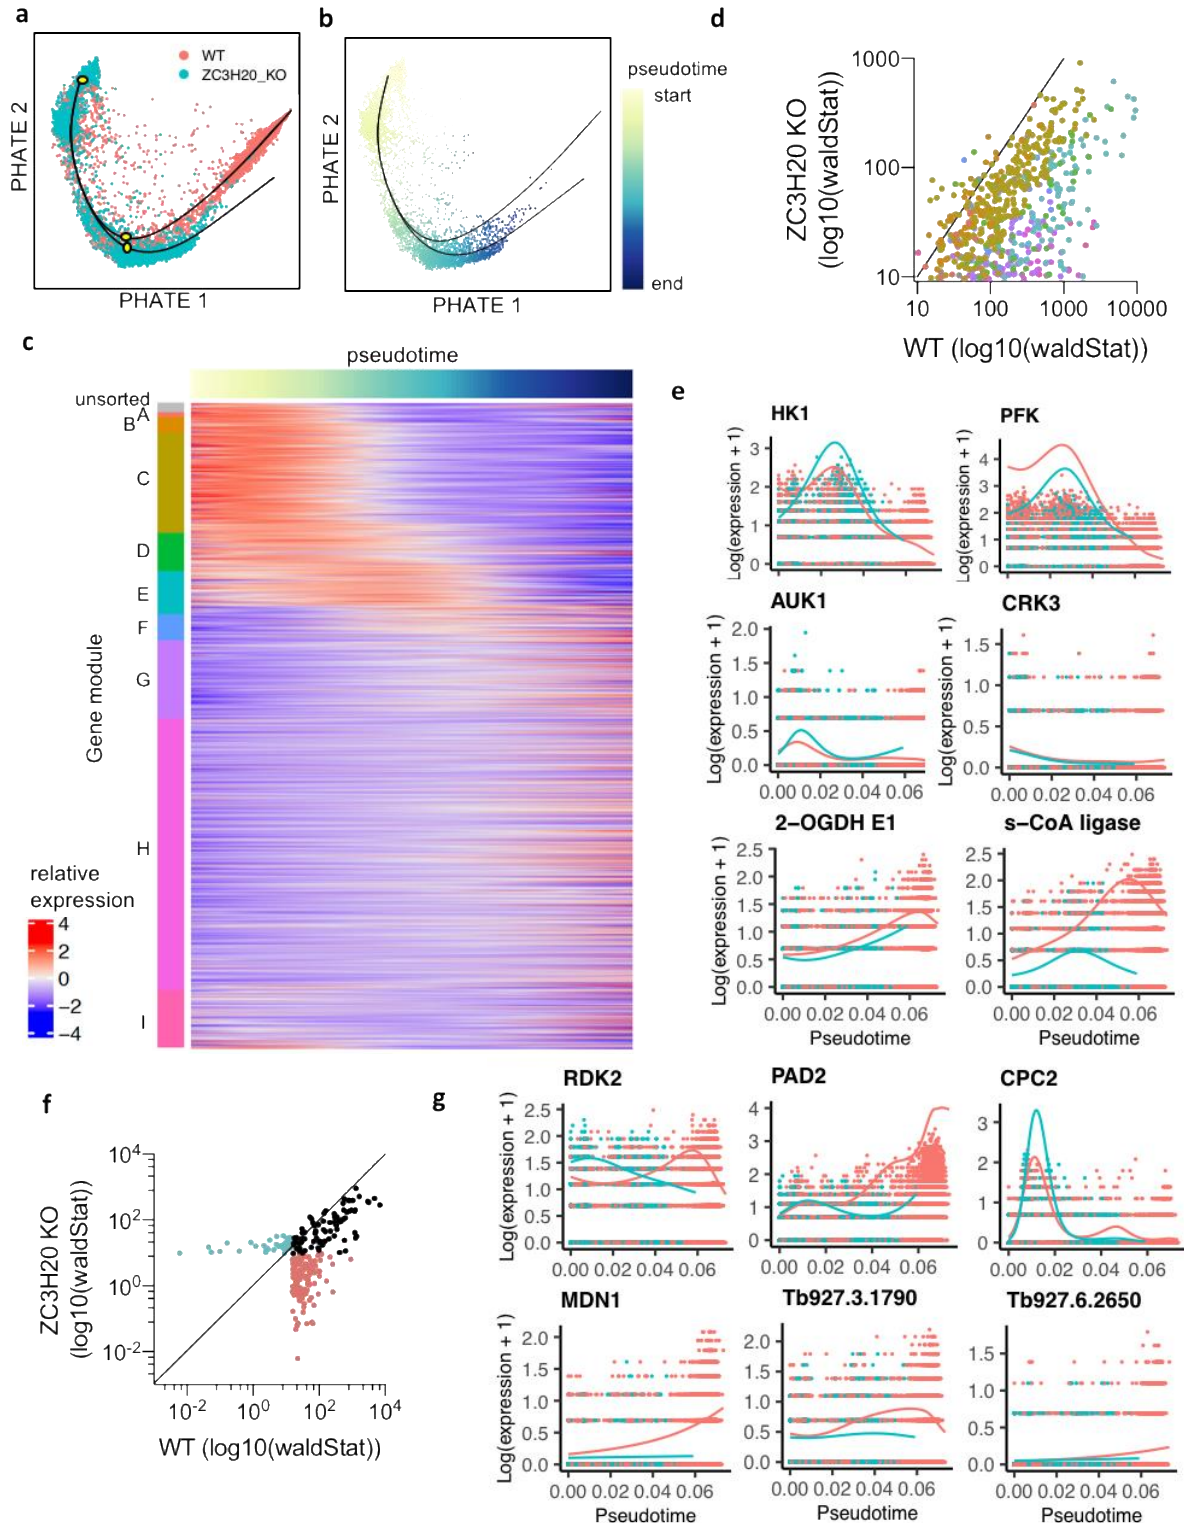

1035  
1036

**Figure 5. Comparison of differentially expressed genes during differentiation of WT cells and differentiation incompetent ZC3H20 KO cells. a)** PHATE map of WT (red) and ZC3H20 KO (blue) parasites. Black line indicates branched trajectories. Yellow dots indicate points of analysis for early differentially expressed genes. **b)** PHATE map of ZC3H20 cells only, coloured by pseudotime values assigned for the second lineage of the branch trajectory, black line. **c)** Scatter plot of differentiation-associated genes also found to be differentially expressed in the ZC3H20 KO trajectory. Axes show the association score ( $\log_{10}(\text{wald stat})$ )

1042

1043 for each gene with the WT differentiation trajectory (x-axis) and ZC3H20 KO trajectory (y-  
1044 axis). Each gene is coloured by its co-expression module identified in **2d**. Black line indicates  
1045  $x=y$ . **d**) Heatmap of all differentiation associated genes ( $n = 2001$ ) identified in **2d**. Relative  
1046 expression across the ZC3H20 KO trajectory is plotted for each gene, grouped by co-  
1047 expression module. **e**) Expression of example genes across the WT differentiation trajectory  
1048 (red) and ZC3H20 KO trajectory (blue). X-axis; pseudotime, y-axis;  $\log(\text{expression} + 1)$ . **f**)  
1049 Scatter plot of genes identified as early differentially expressed across the branched  
1050 trajectory (between white points in **a**). Axes show the association score ( $\log_{10}(\text{wald stat})$ ) for  
1051 each gene with the WT differentiation trajectory (x-axis) and ZC3H20 KO trajectory (y-axis).  
1052 Genes are coloured by their significant association with the WT (red), ZC3H20 KO (blue), or  
1053 both trajectories (black). **g**) Expression patterns of example of early differentially expressed  
1054 genes as in **e**.  
1055

1056

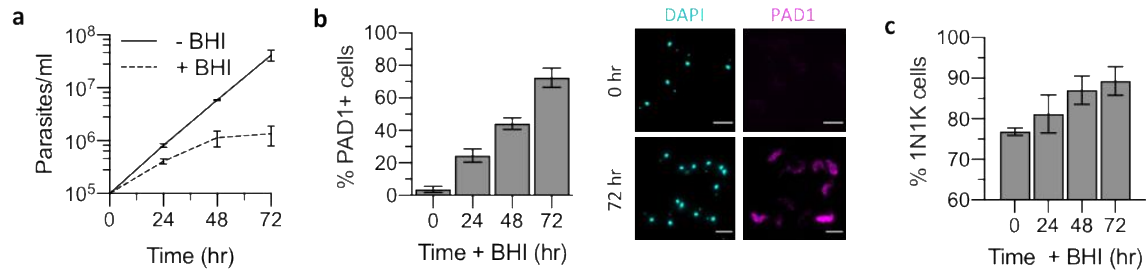

1057

1058

1059

1060

1061

1062

1063

1064

1065

**Fig S1. Brain heat infusion (BHI) broth induces slender to stumpy differentiation *in vitro*.**

**a)** Cumulative growth of pleomorphic *T. brucei* in culture with (dashed line) and without (solid line) 10% BHI broth. Error bars, SD of three independent replicates. **b)** Left:

Percentage of cells expressing stumpy marker protein PAD1 after culturing with 10% BHI. Error bars, SD of triplicate samples. Right: Staining of parasites with anti-PAD1 antibody,

after 72 hr incubation with 10% BHI broth. Scale, 5  $\mu$ m. **c)** Percentage of 1N1K *T. brucei* after

culturing with 10% BHI broth. Error bars, SD of three independent experiments.

1066

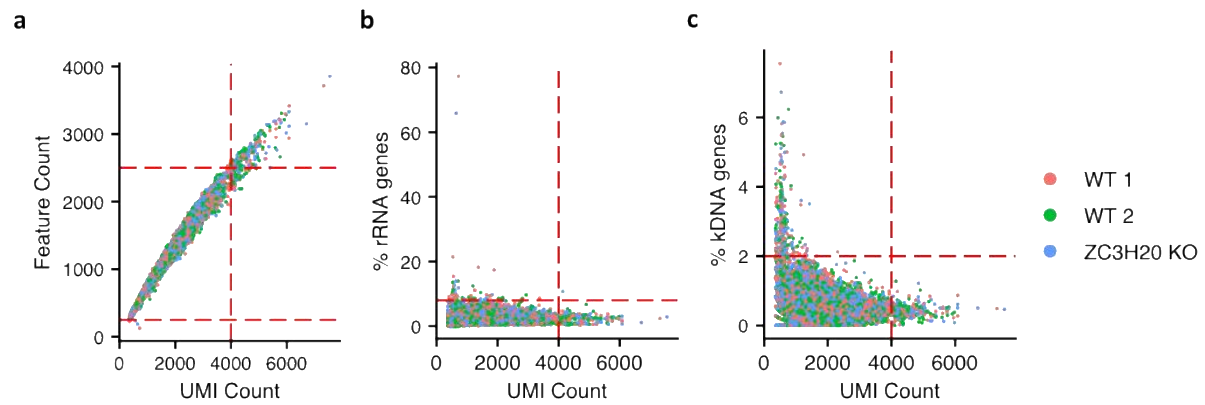

1066

1067

1068

1069

1070

1071

1072

1073

**Fig S2. Quality control and filtering of single transcriptomes.** Scatter plots for WT replicate

1 (red) and 2 (green), ZC3H20 KO (blue) experiments; each data point is one transcriptome.

Plots show the relationship between the number of unique molecular identifiers detected

per cell and **(a)** number of features (genes), **(b)** percentage of features encoding ribosomal

RNA (rRNA) and **(c)** percentage of features encoding on the kDNA maxi circle genome. Red

dashed lines indicate thresholds used to filter cells per experiment; Features count > 250, <

2500, UMI count < 4000, % rRNA genes < 8, % kDNA genes < 2.

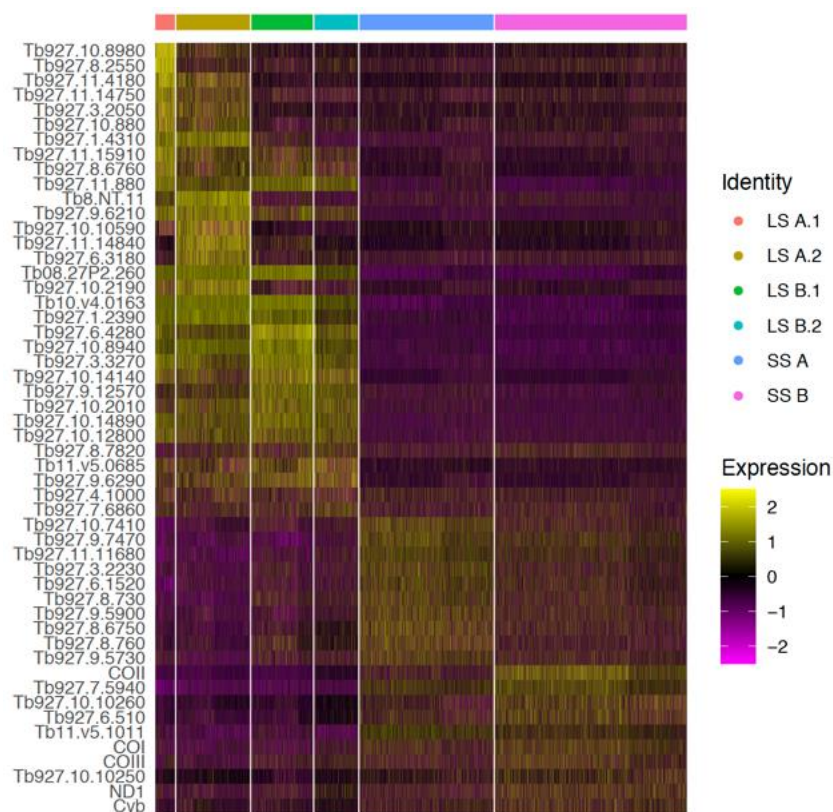

1074  
1075  
1076  
1077  
1078  
1079

**Fig S3. WT and ZC3H20 KO cluster maker genes.** Heatmap showing relative expression of the top 10 unique maker genes of each cluster identified in **4d**. Each row is one gene coloured by relative expression. The gene ID is given for each marker. Each column is one cell grouped according to cluster identity.
